# Supplementary material for: Activation of the PI3K/AKT/mTOR Pathway in Cajal–Retzius Cells Leads to Their Survival and Increases Susceptibility to Kainate-Induced Seizures
Source: MDPI journal article supplement (doi:10.3390/ijms24065376), 2023-03-11
Supplement: s1 [file s1]

| ROSTRO-CAUDAL AXE                                                                                                                      |                    |   |   |                                      |                                   |                           |                 |
|----------------------------------------------------------------------------------------------------------------------------------------|--------------------|---|---|--------------------------------------|-----------------------------------|---------------------------|-----------------|
| Quantification of total number of CR in three neocortex levels (Table 1.1)                                                             |                    |   |   |                                      |                                   |                           |                 |
| Mann-Whitney U test                                                                                                                    | Two-tailed p value | U | N | (E17.5) Mean (10) ± SD (10)          | (P1) Mean (10) ± SD (10)          | Significant (alpha=0.05)? | P value summary |
| Level 1- E17.5 vs P1                                                                                                                   | 0,0286             | 0 | 4 | 20.8 ± 2.67                          | 12.0 ± 2.04                       | Yes                       | *               |
| Level 2- E17.5 vs P1                                                                                                                   | 0,6857             | 6 | 4 | 15.7 ± 1.98                          | 15.7 ± 2.07                       | No                        | ns              |
| Level 3- E17.5 vs P1                                                                                                                   | 0,4571             | 5 | 4 | 16.2 ± 2.88                          | 14.8 ± 2.70                       | No                        | ns              |
| Quantification of CR density (CRs/mm3) in three neocortex levels (Table 1.2)                                                           |                    |   |   |                                      |                                   |                           |                 |
| Mann-Whitney U test                                                                                                                    | Two-tailed p value | U | N | (E17.5) Mean ± SD (10 <sup>3</sup> ) | (P1) Mean ± SD (10 <sup>3</sup> ) | Significant (alpha=0.05)? | P value summary |
| Level 1- E17.5 vs P1                                                                                                                   | 0,0286             | 0 | 4 | 25.5 ± 1.65                          | 14.1 ± 2.43                       | Yes                       | *               |
| Level 2- E17.5 vs P1                                                                                                                   | 0,0286             | 0 | 4 | 23.4 ± 2.47                          | 14.7 ± 2.12                       | Yes                       | *               |
| Level 3- E17.5 vs P1                                                                                                                   | 0,0286             | 0 | 4 | 30.0 ± 2.58                          | 15.4 ± 2.64                       | Yes                       | *               |
| Quantification of the proportion of CRs for the PI3K/AKT/mTOR activity over total tdTOMATO cells in three neocortex levels (Table 1.3) |                    |   |   |                                      |                                   |                           |                 |
| Mann-Whitney U test                                                                                                                    | Two-tailed p value | U | N | (E17.5) Mean ± SD                    | (P1) Mean ± SD                    | Significant (alpha=0.05)? | P value summary |
| CRs positive only for pS6 over total tdTOMATO cells                                                                                    |                    |   |   |                                      |                                   |                           |                 |
| Level 1- E17.5 vs P1                                                                                                                   | 0.4857             | 5 | 4 | 18.7 ± 2.43                          | 15.3 ± 4.86                       | No                        | ns              |
| Level 2- E17.5 vs P1                                                                                                                   | 0.4857             | 5 | 4 | 18.8 ± 7.80                          | 14.5 ± 3.69                       | No                        | ns              |
| Level 3- E17.5 vs P1                                                                                                                   | 0.0571             | 1 | 4 | 18.8 ± 6.90                          | 10.8 ± 2.04                       | No                        | ns              |
| CRs positive only for pAKT over total tdTOMATO cells                                                                                   |                    |   |   |                                      |                                   |                           |                 |
| Level 1- E17.5 vs P1                                                                                                                   | 0.3429             | 4 | 4 | 23.2 ± 6.20                          | 17.2 ± 8.04                       | No                        | ns              |
| Level 2- E17.5 vs P1                                                                                                                   | 0.6857             | 6 | 4 | 26.2 ± 8.95                          | 23.7 ± 6.00                       | No                        | ns              |
| Level 3- E17.5 vs P1                                                                                                                   | 0.8857             | 7 | 4 | 22.3 ± 3.23                          | 25.2 ± 8.93                       | No                        | ns              |
| CRs positive for both pS6 & pAKT over total tdTOMATO cells                                                                             |                    |   |   |                                      |                                   |                           |                 |
| Level 1- E17.5 vs P1                                                                                                                   | 0.0286             | 0 | 4 | 21.4 ± 7.45                          | 8.6 ± 3.55                        | Yes                       | *               |
| Level 2- E17.5 vs P1                                                                                                                   | 0.0286             | 0 | 4 | 24.4 ± 4.98                          | 9.0 ± 3.37                        | Yes                       | *               |
| Level 3- E17.5 vs P1                                                                                                                   | 0.0286             | 0 | 4 | 30.0 ± 7.46                          | 9.4 ± 2.94                        | Yes                       | *               |
| CRs negative for any activity over total tdTOMATO cells                                                                                |                    |   |   |                                      |                                   |                           |                 |
| Level 1- E17.5 vs P1                                                                                                                   | 0.0286             | 0 | 4 | 36.5 ± 7.4                           | 58.8 ± 5.7                        | Yes                       | *               |
| Level 2- E17.5 vs P1                                                                                                                   | 0.0286             | 0 | 4 | 30.3 ± 4.50                          | 52.6 ± 9.06                       | Yes                       | *               |
| Level 3- E17.5 vs P1                                                                                                                   | 0.0286             | 0 | 4 | 28.6 ± 2.24                          | 54.4 ± 12.07                      | Yes                       | *               |

MEDIO-LATERAL AXE in three neocortex levels

Analysis of the PI3K/AKT/mTOR Pathway activity distribution along the medio-lateral axis in three neocortex levels at E17.5 and P1 (Table 1.4 and Table 1.5)

|                         | E17.5 (Table 1.4) |          |   |                           |                 | P1 (Table 1.5) |          |   |                           |                 |
|-------------------------|-------------------|----------|---|---------------------------|-----------------|----------------|----------|---|---------------------------|-----------------|
|                         | p value           | Distance | N | Significant (alpha=0.05)? | P value summary | p value        | Distance | N | Significant (alpha=0.05)? | P value summary |
| Kolmogorov-Smirnov test |                   |          |   |                           |                 |                |          |   |                           |                 |
| pS6 vs tdT              |                   |          |   |                           |                 |                |          |   |                           |                 |
| Level 1                 | <0.0001           | 0.2943   | 4 | Yes                       | ****            | 0.7833         | 0.0828   | 4 | No                        | ns              |
| Level 2                 | 0.0006            | 0.2043   | 4 | Yes                       | ***             | 0.1294         | 0.1312   | 4 | No                        | ns              |
| Level 3                 | 0.0047            | 0.1707   | 4 | Yes                       | **              | <0.0001        | 0.294    | 4 | Yes                       | ****            |
| pAKT vs tdT             |                   |          |   |                           |                 |                |          |   |                           |                 |
| Level 1                 | 0.0094            | 0.1308   | 4 | Yes                       | **              | 0.0577         | 0.1583   | 4 | No                        | ns              |
| Level 2                 | 0.0001            | 0.1911   | 4 | Yes                       | ***             | <0.0001        | 0.2105   | 4 | Yes                       | ****            |
| Level 3                 | <0.0001           | 0.2086   | 4 | Yes                       | ****            | 0.0018         | 0.1696   | 4 | Yes                       | **              |
| pS6 & pAKT vs tdT       |                   |          |   |                           |                 |                |          |   |                           |                 |
| Level 1                 | 0.0069            | 0.1401   | 4 | Yes                       | **              | 0.003          | 0.2967   | 4 | Yes                       | **              |
| Level 2                 | 0.226             | 0.09316  | 4 | No                        | ns              | 0.0174         | 0.2148   | 4 | Yes                       | *               |
| Level 3                 | 0.0401            | 0.1154   | 4 | Yes                       | *               | 0.4064         | 0.1225   | 4 | No                        | ns              |

Quantification of CR density (CRs/mm<sup>3</sup>) at P1 stage in three neocortex levels

Table 2.1

|         | Control                                         | PIK3CA                                          | TSC1                                           | PTEN                                           |
|---------|-------------------------------------------------|-------------------------------------------------|------------------------------------------------|------------------------------------------------|
|         | Mean (10 <sup>3</sup> ) ± SD (10 <sup>3</sup> ) | Mean (10 <sup>3</sup> ) ± SD (10 <sup>3</sup> ) | Mean(10 <sup>3</sup> ) ± SD (10 <sup>3</sup> ) | Mean(10 <sup>3</sup> ) ± SD (10 <sup>3</sup> ) |
| Level 1 | 14.1 ± 2.43                                     | 10.6 ± 1.06                                     | 11.0 ± 3.89                                    | 8.1 ± 3.35                                     |
| Level 2 | 14.7 ± 2.12                                     | 10.9 ± 3.00                                     | 9.9 ± 2.79                                     | 8.7 ± 3.59                                     |
| Level 3 | 15.4 ± 2.64                                     | 11.9 ± 4.98                                     | 10.2 ± 4.41                                    | 10.1 ± 6.37                                    |

Table 2.2

| Two way ANOVA table      | SS       | DF      | MS       | F (DFn, DFd)        | P value  | Summary | Significant? |
|--------------------------|----------|---------|----------|---------------------|----------|---------|--------------|
| <b>control vs PIK3CA</b> |          |         |          |                     |          |         |              |
| Interaction              | 135,9E+3 | 2,0E+0  | 67,9E+3  | F (2, 12) = 0.01026 | 989,8E-3 | ns      | No           |
| levels                   | 7,7E+6   | 2,0E+0  | 3,8E+6   | F (2, 12) = 0.5810  | 574,3E-3 | ns      | No           |
| Genotype                 | 76,7E+6  | 1,0E+0  | 76,7E+6  | F (1, 6) = 5.945    | 50,6E-3  | ns      | No           |
| Subject                  | 77,4E+6  | 6,0E+0  | 12,9E+6  | F (6, 12) = 1.949   | 153,2E-3 | ns      | No           |
| Residual                 | 79,5E+6  | 12,0E+0 | 6,6E+6   |                     |          |         |              |
| <b>control vs TSC1</b>   |          |         |          |                     |          |         |              |
| Interaction              | 5,2E+6   | 2,0E+0  | 2,6E+6   | F (2, 12) = 0.5317  | 600,8E-3 | ns      | No           |
| levels                   | 996,9E+3 | 2,0E+0  | 498,5E+3 | F (2, 12) = 0.1026  | 903,3E-3 | ns      | No           |
| Genotype                 | 114,1E+6 | 1,0E+0  | 114,1E+6 | F (1, 6) = 5.653    | 55,0E-3  | ns      | No           |
| Subject                  | 121,1E+6 | 6,0E+0  | 20,2E+6  | F (6, 12) = 4.155   | 17,2E-3  | *       | Yes          |
| Residual                 | 58,3E+6  | 12,0E+0 | 4,9E+6   |                     |          |         |              |
| <b>control vs PTEN</b>   |          |         |          |                     |          |         |              |
| Interaction              | 555,2E+3 | 2,0E+0  | 277,6E+3 | F (2, 12) = 0.04847 | 952,9E-3 | ns      | No           |
| levels                   | 12,0E+6  | 2,0E+0  | 6,0E+6   | F (2, 12) = 1.047   | 380,9E-3 | ns      | No           |
| Genotype                 | 198,6E+6 | 1,0E+0  | 198,6E+6 | F (1, 6) = 6.711    | 41,2E-3  | *       | Yes          |
| Subject                  | 177,5E+6 | 6,0E+0  | 29,6E+6  | F (6, 12) = 5.167   | 7,7E-3   | **      | Yes          |
| Residual                 | 68,7E+6  | 12,0E+0 | 5,7E+6   |                     |          |         |              |

| Sidak's multiple comparisons test | Mean 1 (Control) | Mean 2 (Mutant) | Mean Diff. | SE of diff. | 95.00% CI of diff. | N1 | N2 | t     | DF | justed P Val | Summary | Significant? |
|-----------------------------------|------------------|-----------------|------------|-------------|--------------------|----|----|-------|----|--------------|---------|--------------|
| Level 1                           |                  |                 |            |             |                    |    |    |       |    |              |         |              |
| Control vs. PIK3CA                | 14055            | 10606           | 3449       | 2577        | -4805 to 11704     | 4  | 4  | 1.338 | 36 | 0.9771       | ns      | No           |
| Control vs. TSC1                  | 14055            | 10972           | 3083       | 2577        | -5172 to 11337     | 4  | 4  | 1.196 | 36 | 0.9928       | ns      | No           |
| Control vs. PTEN                  | 14055            | 8072            | 5983       | 2577        | -2272 to 14238     | 4  | 4  | 2.321 | 36 | 0.3781       | ns      | No           |
| Level 2                           |                  |                 |            |             |                    |    |    |       |    |              |         |              |
| Control vs. PIK3CA                | 14685            | 10898           | 3787       | 2577        | -4467 to 12042     | 4  | 4  | 1.469 | 36 | 0.9468       | ns      | No           |
| Control vs. TSC1                  | 14685            | 9944            | 4742       | 2577        | -3513 to 12997     | 4  | 4  | 1.84  | 36 | 0.7496       | ns      | No           |
| Control vs. PTEN                  | 14685            | 8733            | 5953       | 2577        | -2302 to 14207     | 4  | 4  | 2.31  | 36 | 0.3862       | ns      | No           |
| Level 3                           |                  |                 |            |             |                    |    |    |       |    |              |         |              |
| Control vs. PIK3CA                | 15439            | 11948           | 3491       | 2577        | -4764 to 11746     | 4  | 4  | 1.355 | 36 | 0.9743       | ns      | No           |
| Control vs. TSC1                  | 15439            | 10182           | 5257       | 2577        | -2997 to 13512     | 4  | 4  | 2.04  | 36 | 0.5933       | ns      | No           |
| Control vs. PTEN                  | 15439            | 10116           | 5323       | 2577        | -2932 to 13578     | 4  | 4  | 2.065 | 36 | 0.5728       | ns      | No           |

Table 2.3

| Quantification of the proportion of CRs for the PI3K/AKT/mTOR activity over total tdTOMATO cells in three neocortex levels at P1 stage |                    |   |                         |                       |                      |                           |                 |
|----------------------------------------------------------------------------------------------------------------------------------------|--------------------|---|-------------------------|-----------------------|----------------------|---------------------------|-----------------|
| Mann-Whitney U test                                                                                                                    | Two-tailed p value | U | N (Control and Mutants) | Mean $\pm$ SD Control | Mean $\pm$ SD Mutant | Significant (alpha=0.05)? | P value summary |
| CRs positive only for pS6 over total tdTOMATO cells P1 stage                                                                           |                    |   |                         |                       |                      |                           |                 |
| Level 1                                                                                                                                |                    |   |                         |                       |                      |                           |                 |
| Control vs. PIK3CA                                                                                                                     | 0.1143             | 2 | 4                       | 15.5 $\pm$ 4.57       | 8.2 $\pm$ 4.21       | No                        | ns              |
| Control vs. TSC1                                                                                                                       | 0.6857             | 6 | 4                       | 15.5 $\pm$ 4.57       | 16.7 $\pm$ 9.78      | No                        | ns              |
| Control vs. PTEN                                                                                                                       | 0.3429             | 4 | 4                       | 15.5 $\pm$ 4.57       | 10.3 $\pm$ 3.84      | No                        | ns              |
| Level 2                                                                                                                                |                    |   |                         |                       |                      |                           |                 |
| Control vs. PIK3CA                                                                                                                     | 0.1143             | 2 | 4                       | 14.0 $\pm$ 3.58       | 9.0 $\pm$ 3.01       | No                        | ns              |
| Control vs. TSC1                                                                                                                       | 0.1143             | 2 | 4                       | 14.0 $\pm$ 3.58       | 21.8 $\pm$ 5.33      | No                        | ns              |
| Control vs. PTEN                                                                                                                       | 0.4571             | 5 | 4                       | 14.0 $\pm$ 3.58       | 10.2 $\pm$ 5.75      | No                        | ns              |
| Level 3                                                                                                                                |                    |   |                         |                       |                      |                           |                 |
| Control vs. PIK3CA                                                                                                                     | 0.6857             | 6 | 4                       | 10.8 $\pm$ 2.04       | 10.2 $\pm$ 4.84      | No                        | ns              |
| Control vs. TSC1                                                                                                                       | 0.0286             | 0 | 4                       | 10.8 $\pm$ 2.04       | 24.0 $\pm$ 5.52      | Yes                       | *               |
| Control vs. PTEN                                                                                                                       | 0.2                | 3 | 4                       | 10.8 $\pm$ 2.04       | 6.5 $\pm$ 3.63       | No                        | ns              |
| CRs positive only for pAKT over total tdTOMATO cells P1 stage                                                                          |                    |   |                         |                       |                      |                           |                 |
| Level 1                                                                                                                                |                    |   |                         |                       |                      |                           |                 |
| Control vs. PIK3CA                                                                                                                     | 0.8857             | 7 | 4                       | 17.4 $\pm$ 8.4        | 17.0 $\pm$ 3.94      | No                        | ns              |
| Control vs. TSC1                                                                                                                       | 0.4857             | 5 | 4                       | 17.4 $\pm$ 8.4        | 22.9 $\pm$ 9.95      | No                        | ns              |
| Control vs. PTEN                                                                                                                       | 0.0286             | 0 | 4                       | 17.4 $\pm$ 8.4        | 6.7 $\pm$ 3.05       | Yes                       | *               |
| Level 2                                                                                                                                |                    |   |                         |                       |                      |                           |                 |
| Control vs. PIK3CA                                                                                                                     | 0.2                | 3 | 4                       | 23.1 $\pm$ 5.26       | 14.3 $\pm$ 8.62      | No                        | ns              |
| Control vs. TSC1                                                                                                                       | 0.0286             | 0 | 4                       | 23.1 $\pm$ 5.26       | 9.5 $\pm$ 5.26       | Yes                       | *               |
| Control vs. PTEN                                                                                                                       | 0.0571             | 1 | 4                       | 23.1 $\pm$ 5.26       | 12.7 $\pm$ 6.67      | No                        | ns              |
| Level 3                                                                                                                                |                    |   |                         |                       |                      |                           |                 |
| Control vs. PIK3CA                                                                                                                     | 0.4857             | 5 | 4                       | 25.5 $\pm$ 9.08       | 17.9 $\pm$ 18.7      | No                        | ns              |
| Control vs. TSC1                                                                                                                       | 0.4857             | 5 | 4                       | 25.5 $\pm$ 9.08       | 16.6 $\pm$ 11.4      | No                        | ns              |
| Control vs. PTEN                                                                                                                       | 0.3429             | 4 | 4                       | 25.5 $\pm$ 9.08       | 15.6 $\pm$ 13.90     | No                        | ns              |
| CRs positive for both pS6 & pAKT over total tdTOMATO cells P1 stage                                                                    |                    |   |                         |                       |                      |                           |                 |
| Level 1                                                                                                                                |                    |   |                         |                       |                      |                           |                 |
| Control vs. PIK3CA                                                                                                                     | 0.0286             | 0 | 4                       | 8.6 $\pm$ 3.55        | 38.1 $\pm$ 15.3      | Yes                       | *               |
| Control vs. TSC1                                                                                                                       | 0.0571             | 1 | 4                       | 8.6 $\pm$ 3.55        | 16.3 $\pm$ 4.53      | No                        | ns              |
| Control vs. PTEN                                                                                                                       | 0.8857             | 7 | 4                       | 8.6 $\pm$ 3.55        | 11.7 $\pm$ 8.49      | No                        | ns              |
| Level 2                                                                                                                                |                    |   |                         |                       |                      |                           |                 |
| Control vs. PIK3CA                                                                                                                     | 0.0286             | 0 | 4                       | 9.04 $\pm$ 3.37       | 24.8 $\pm$ 16.09     | Yes                       | *               |
| Control vs. TSC1                                                                                                                       | 0.8857             | 7 | 4                       | 9.04 $\pm$ 3.37       | 12.2 $\pm$ 10.27     | No                        | ns              |
| Control vs. PTEN                                                                                                                       | 0.2                | 3 | 4                       | 9.04 $\pm$ 3.37       | 22.2 $\pm$ 14.67     | No                        | ns              |
| Level 3                                                                                                                                |                    |   |                         |                       |                      |                           |                 |
| Control vs. PIK3CA                                                                                                                     | 0.0286             | 0 | 4                       | 9.4 $\pm$ 2.94        | 38.5 $\pm$ 13.58     | Yes                       | *               |
| Control vs. TSC1                                                                                                                       | 0.0286             | 0 | 4                       | 9.4 $\pm$ 2.94        | 20.5 $\pm$ 10.15     | Yes                       | *               |
| Control vs. PTEN                                                                                                                       | 0.0286             | 0 | 4                       | 9.4 $\pm$ 2.94        | 37.0 $\pm$ 18.29     | Yes                       | *               |
| CRs negative for any activity over total tdTOMATO cells P1 stage                                                                       |                    |   |                         |                       |                      |                           |                 |
| Level 1                                                                                                                                |                    |   |                         |                       |                      |                           |                 |
| Control vs. PIK3CA                                                                                                                     | 0.0286             | 0 | 4                       | 58.3 $\pm$ 6.07       | 36.4 $\pm$ 11.73     | Yes                       | *               |
| Control vs. TSC1                                                                                                                       | 0.0286             | 0 | 4                       | 58.3 $\pm$ 6.07       | 43.9 $\pm$ 4.21      | Yes                       | *               |
| Control vs. PTEN                                                                                                                       | 0.2                | 3 | 4                       | 58.3 $\pm$ 6.07       | 71.0 $\pm$ 13.01     | No                        | ns              |
| Level 2                                                                                                                                |                    |   |                         |                       |                      |                           |                 |
| Control vs. PIK3CA                                                                                                                     | 0.6857             | 6 | 4                       | 53.7 $\pm$ 8.11       | 51.7 $\pm$ 17.71     | No                        | ns              |
| Control vs. TSC1                                                                                                                       | 0.6857             | 6 | 4                       | 53.7 $\pm$ 8.11       | 56.4 $\pm$ 9.30      | No                        | ns              |
| Control vs. PTEN                                                                                                                       | 0.8857             | 7 | 4                       | 53.7 $\pm$ 8.11       | 54.7 $\pm$ 17.9      | No                        | ns              |
| Level 3                                                                                                                                |                    |   |                         |                       |                      |                           |                 |
| Control vs. PIK3CA                                                                                                                     | 0.1143             | 2 | 4                       | 54.1 $\pm$ 12.13      | 33.22 $\pm$ 20.25    | No                        | ns              |
| Control vs. TSC1                                                                                                                       | 0.3429             | 4 | 4                       | 54.1 $\pm$ 12.13      | 38.8 $\pm$ 15.32     | No                        | ns              |
| Control vs. PTEN                                                                                                                       | 0.4857             | 5 | 4                       | 54.1 $\pm$ 12.13      | 40.7 $\pm$ 20.3      | No                        | ns              |

**Table 2.4**

| Quantification of the neocortex thickness ( $\mu\text{m}$ ) of control and mutants in the futur S1 brain area at P1 stage (level 2) |                   |                   |                   |
|-------------------------------------------------------------------------------------------------------------------------------------|-------------------|-------------------|-------------------|
| Unpaired t test                                                                                                                     | PIK3CA Vs Control | TSC1 Vs Control   | PTEN Vs Control   |
| P value                                                                                                                             | 0,0343            | 0,218             | 0,0412            |
| P value summary                                                                                                                     | *                 | ns                | *                 |
| Significantly different ( $P < 0.05$ )?                                                                                             | Yes               | No                | Yes               |
| One- or two-tailed P value?                                                                                                         | Two-tailed        | Two-tailed        | Two-tailed        |
| t, df                                                                                                                               | t=2.727, df=6     | t=1.409, df=5     | t=2.590, df=6     |
| How big is the difference?                                                                                                          |                   |                   |                   |
| Mean of control                                                                                                                     | 548,8             | 548,8             | 548,8             |
| Mean of mutant                                                                                                                      | 651,8             | 575               | 627,5             |
| Difference between means $\pm$ SEM                                                                                                  | 103.0 $\pm$ 37.76 | 26.25 $\pm$ 18.64 | 78.75 $\pm$ 30.40 |
| 95% confidence interval                                                                                                             | 10.59 to 195.4    | -21.65 to 74.15   | 4.358 to 153.1    |
| R squared (eta squared)                                                                                                             | 0,5535            | 0,2841            | 0,5279            |
| F test to compare variances                                                                                                         |                   |                   |                   |
| F, DFn, Dfd                                                                                                                         | 9.122, 3, 3       | 1.141, 2, 3       | 5.560, 3, 3       |
| P value                                                                                                                             | 0,1023            | 0,8561            | 0,1926            |
| P value summary                                                                                                                     | ns                | ns                | ns                |
| Significantly different ( $P < 0.05$ )?                                                                                             | No                | No                | No                |
| Data analyzed                                                                                                                       |                   |                   |                   |
| Sample size, Control                                                                                                                | 4                 | 4                 | 4                 |
| Sample size, mutant                                                                                                                 | 4                 | 3                 | 4                 |

# ROSTRO-CAUDAL AXE

Quantification of CR density (CRs/mm3) at P24 stage in three neocortex levels (Table 3.1)

|         | Control       | PIK3CA        | TSC1          | PTEN           |
|---------|---------------|---------------|---------------|----------------|
|         | Mean ± SD     | Mean ± SD     | Mean ± SD     | Mean ± SD      |
| Level 1 | 362.7 ± 111.4 | 957.0 ± 220.2 | 633.8 ± 84.5  | 1322.0 ± 508.9 |
| Level 2 | 273.0 ± 97.1  | 1134.3 ± 82.0 | 553.4± 207.2  | 1816.4 ± 566.7 |
| Level 3 | 556.7 ± 138.5 | 1472.2± 271.8 | 1054.3± 233.8 | 2022.5 ± 733.7 |

## control vs PIK3CA

| Two Way ANOVA table | SS      | DF | MS      | F (DFn, DFd)      | P value | Summary | Significant? |
|---------------------|---------|----|---------|-------------------|---------|---------|--------------|
| Interaction         | 131369  | 2  | 65684   | F (2, 14) = 4.074 | 0.0403  | *       | Yes          |
| level               | 664455  | 2  | 332228  | F (2, 14) = 20.61 | <0.0001 | ****    | Yes          |
| Genotype            | 4164352 | 1  | 4164352 | F (1, 7) = 89.42  | <0.0001 | ****    | Yes          |
| Subjects (matching) | 325989  | 7  | 46570   | F (7, 14) = 2.888 | 0.0433  | *       | Yes          |
| Residual            | 225730  | 14 | 16124   |                   |         |         |              |

| Sidak's multiple comparisons test                                                   | Mean 1 (control) | Mean 2 (PIK3CA) | Mean Diff. | SE of diff. | 95.00% CI of diff. | N1 (control) | N2 (PIK3CA) | t     | DF | Adjusted P Value | Summary | Significant? |
|-------------------------------------------------------------------------------------|------------------|-----------------|------------|-------------|--------------------|--------------|-------------|-------|----|------------------|---------|--------------|
| Delta Np73 <sup>Cre/+</sup> - Delta Np73 <sup>Cre/+</sup> > R26 <sup>p110/101</sup> |                  |                 |            |             |                    |              |             |       |    |                  |         |              |
| Level1 ( control vs PIK3CA)                                                         | 362.8            | 957.1           | -594.3     | 108.7       | -876.3 to -312.3   | 5            | 4           | 5.466 | 21 | <0.0001          | ****    | Yes          |
| Level2 ( control vs PIK3CA)                                                         | 273.1            | 1134            | -861.3     | 108.7       | -1143 to -579.3    | 5            | 4           | 7.921 | 21 | <0.0001          | ****    | Yes          |
| Level3 ( control vs PIK3CA)                                                         | 556.8            | 1472            | -915.5     | 108.7       | -1197 to -633.5    | 5            | 4           | 8.42  | 21 | <0.0001          | ****    | Yes          |

## control vs TSC1

| Two Way ANOVA table | SS     | DF | MS     | F (DFn, DFd)      | P value | Summary | Significant? |
|---------------------|--------|----|--------|-------------------|---------|---------|--------------|
| Interaction         | 73024  | 2  | 36512  | F (2, 14) = 4.533 | 0.0304  | *       | Yes          |
| Level               | 757233 | 2  | 378617 | F (2, 14) = 47    | <0.0001 | ****    | Yes          |
| Genotype            | 815284 | 1  | 815284 | F (1, 7) = 15.6   | 0.0055  | **      | Yes          |
| Subjects (matching) | 365758 | 7  | 52251  | F (7, 14) = 6.487 | 0.0015  | **      | Yes          |
| Residual            | 112774 | 14 | 8055   |                   |         |         |              |

| Sidak's multiple comparisons test                                       | Mean 1 (control) | Mean 2 (TSC1) | Mean Diff. | SE of diff. | 95.00% CI of diff. | N1 (control) | N2 (TSC1) | t     | DF | Adjusted P Value | Summary | Significant? |
|-------------------------------------------------------------------------|------------------|---------------|------------|-------------|--------------------|--------------|-----------|-------|----|------------------|---------|--------------|
| Delta Np73 <sup>Cre/+</sup> - Delta Np73 <sup>Cre/+</sup> > TSC1lox/del |                  |               |            |             |                    |              |           |       |    |                  |         |              |
| Level1 ( control vs TSC1)                                               | 362.8            | 633.9         | -271.1     | 101.3       | -533.8 to -8.492   | 5            | 4         | 2.677 | 21 | 0.0417           | *       | Yes          |
| Level2 ( control vs TSC1)                                               | 273.1            | 553.4         | -280.4     | 101.3       | -543 to -17.73     | 5            | 4         | 2.769 | 21 | 0.0341           | *       | Yes          |
| Level3 ( control vs TSC1)                                               | 556.8            | 1054          | -497.6     | 101.3       | -760.3 to -235     | 5            | 4         | 4.914 | 21 | 0.0002           | ***     | Yes          |

## control vs PTEN\*

| Multiple t-test          | Mean1 (control) | Mean2 (PTEN) | Difference | SE of difference | t ratio | df | N1 (control) | N2 (PTEN) | P value | Summary | Significant? |
|--------------------------|-----------------|--------------|------------|------------------|---------|----|--------------|-----------|---------|---------|--------------|
| Level1 (control vs PTEN) | 362.8           | 1322         | 959.3      | 234.5            | 4.091   | 10 | 5            | 7         | 0.0022  | ##      | Yes          |
| Level2 (control vs PTEN) | 273.1           | 1816         | 1543       | 259.6            | 5.946   | 10 | 5            | 7         | 0.0001  | ###     | Yes          |
| Level3 (control vs PTEN) | 556.8           | 2023         | 1466       | 336.7            | 4.353   | 10 | 5            | 7         | 0.0014  | ##      | Yes          |

## TSC1 vs PTEN\*

| Multiple t-test       | Mean1 PTEN | Mean2 TSC1 | Difference | SE of difference | t ratio | df | N1 (PTEN) | N2 (TSC1) | P value | Summary | Significant? |
|-----------------------|------------|------------|------------|------------------|---------|----|-----------|-----------|---------|---------|--------------|
| Level1 (PTEN vs TSC1) | 1322       | 633.9      | 688.2      | 262.3            | 2.624   | 9  | 7         | 4         | 0.0276  | *       | Yes          |
| Level2 (PTEN vs TSC1) | 1816       | 553.4      | 1263       | 299.6            | 4.215   | 9  | 7         | 4         | 0.0022  | **      | Yes          |
| Level3 (PTEN vs TSC1) | 2023       | 1054       | 968.2      | 384.9            | 2.515   | 9  | 7         | 4         | 0.033   | *       | Yes          |

\* Due to unequal variance (larger variation in pten mutants) we used multiple-t-test to compare Pten data to either control or Tsc1

**MEDIO-LATERAL AXE in three neocortex levels**

Quantification of CR density (CRs/mm<sup>3</sup>) at P24 along medio-lateral and rostro-caudal axes (Table 3.2)

**control vs PIK3CA**

| Two ways ANOVA table | SS      | DF | MS      | F (DFn, DFd)      | P value | Summary | Significant? |
|----------------------|---------|----|---------|-------------------|---------|---------|--------------|
| <b>Level 1</b>       |         |    |         |                   |         |         |              |
| Interaction          | 1221622 | 3  | 407207  | F (3, 21) = 5.353 | 0.0068  | **      | Yes          |
| Lateral axe          | 4351360 | 3  | 1450453 | F (3, 21) = 19.07 | <0.0001 | ****    | Yes          |
| Genotype             | 4002641 | 1  | 4002641 | F (1, 7) = 22.05  | 0.0022  | **      | Yes          |
| Subjects (matching)  | 1270643 | 7  | 181520  | F (7, 21) = 2.386 | 0.0581  | ns      | No           |
| Residual             | 1597545 | 21 | 76074   |                   |         |         |              |
| <b>Level 2</b>       |         |    |         |                   |         |         |              |
| Interaction          | 1175038 | 3  | 391679  | F (3, 21) = 29.31 | <0.0001 | ****    | Yes          |
| Lateral Axe          | 3190997 | 3  | 1063666 | F (3, 21) = 79.6  | <0.0001 | ****    | Yes          |
| Genotype             | 6357467 | 1  | 6357467 | F (1, 7) = 178.3  | <0.0001 | ****    | Yes          |
| Subjects (matching)  | 249613  | 7  | 35659   | F (7, 21) = 2.669 | 0.0384  | *       | Yes          |
| Residual             | 280613  | 21 | 13363   |                   |         |         |              |
| <b>Level 3</b>       |         |    |         |                   |         |         |              |
| Interaction          | 1212739 | 2  | 606369  | F (2, 14) = 6.746 | 0.0089  | **      | No           |
| Lateral Axe          | 6063707 | 2  | 3031854 | F (2, 14) = 33.73 | <0.0001 | ****    | Yes          |
| Genotype             | 5026709 | 1  | 5026709 | F (1, 7) = 30.13  | 0.0009  | ***     | Yes          |
| Subjects (matching)  | 1167724 | 7  | 166818  | F (7, 14) = 1.856 | 0.1538  | ns      | No           |
| Residual             | 1258330 | 14 | 89881   |                   |         |         |              |

| Sidak's multiple comparisons test | Mean 1 (control) | Mean 2 (PIK3CA) | Mean Diff. | SE of diff. | 95.00% CI of diff. | N1 (control) | N2 (PIK3CA) | t     | DF | Adjusted P Value | Summary | Significant? |
|-----------------------------------|------------------|-----------------|------------|-------------|--------------------|--------------|-------------|-------|----|------------------|---------|--------------|
| <b>Level 1</b>                    |                  |                 |            |             |                    |              |             |       |    |                  |         |              |
| ACA ( control vs PIK3CA)          | 980              | 1349            | -369.4     | 214.7       | -940.8 to 202      | 5            | 4           | 1.721 | 28 | 0.3332           | ns      | No           |
| MOs ( control vs PIK3CA)          | 369              | 1541            | -1172      | 214.7       | -1743 to -600.3    | 5            | 4           | 5.457 | 28 | <0.0001          | ****    | Yes          |
| MOp ( control vs PIK3CA)          | 201.2            | 1080            | -878.4     | 214.7       | -1450 to -307      | 5            | 4           | 4.091 | 28 | 0.0013           | **      | Yes          |
| SSp ( control vs PIK3CA)          | 104.3            | 369             | -264.7     | 214.7       | -836.1 to 306.7    | 5            | 4           | 1.233 | 28 | 0.6445           | ns      | No           |
| <b>Level 2</b>                    |                  |                 |            |             |                    |              |             |       |    |                  |         |              |
| RSP-MO ( control vs PIK3CA)       | 467.5            | 1866            | -1398      | 92.31       | -1644 to -1152     | 5            | 4           | 15.15 | 28 | <0.0001          | ****    | Yes          |
| SSp ( control vs PIK3CA)          | 247.9            | 1192            | -943.9     | 92.31       | -1190 to -698.2    | 5            | 4           | 10.22 | 28 | <0.0001          | ****    | Yes          |
| SSp-bfd ( control vs PIK3CA)      | 150.1            | 636.6           | -486.4     | 92.31       | -732.1 to -240.8   | 5            | 4           | 5.27  | 28 | <0.0001          | ****    | Yes          |
| SSs-AUD ( control vs PIK3CA)      | 205.5            | 759.8           | -554.4     | 92.31       | -800.1 to -308.7   | 5            | 4           | 6.005 | 28 | <0.0001          | ****    | Yes          |
| <b>Level 3</b>                    |                  |                 |            |             |                    |              |             |       |    |                  |         |              |
| RSP( control vs PIK3CA)           | 945.7            | 2356            | -1410      | 228         | -2002 to -819      | 5            | 4           | 6.186 | 21 | <0.0001          | ****    | Yes          |
| VIS ( control vs PIK3CA)          | 242.9            | 1069            | -826.6     | 228         | -1418 to -235.2    | 5            | 4           | 3.625 | 21 | 0.0048           | **      | Yes          |
| AUD ( control vs PIK3CA)          | 439.3            | 807.4           | -368.1     | 228         | -959.5 to 223.2    | 5            | 4           | 1.614 | 21 | 0.3217           | ns      | No           |

control vs TSC1

| Two ways ANOVA table | SS      | DF | MS      | F (DFn, DFd)       | P value | Summary | Significant? |
|----------------------|---------|----|---------|--------------------|---------|---------|--------------|
| Level 1              |         |    |         |                    |         |         |              |
| Interaction          | 565981  | 3  | 188660  | F (3, 21) = 5.459  | 0,0062  | ***     | Yes          |
| Lateral axe          | 7267043 | 3  | 2422348 | F (3, 21) = 70.09  | <0.0001 | ****    | Yes          |
| Genotype             | 583725  | 1  | 583725  | F (1, 7) = 8.285   | 0,0237  | *       | Yes          |
| Subjects (matching)  | 493194  | 7  | 70456   | F (7, 21) = 2.039  | 0,0977  | ns      | No           |
| Residual             | 725786  | 21 | 34561   |                    |         |         |              |
| Level 2              |         |    |         |                    |         |         |              |
| Interaction          | 217565  | 3  | 72522   | F (3, 21) = 3.332  | 0,0391  | *       | Yes          |
| Lateral axe          | 971351  | 3  | 323784  | F (3, 21) = 14.88  | <0.0001 | ****    | Yes          |
| Genotype             | 628213  | 1  | 628213  | F (1, 7) = 6.887   | 0,0342  | *       | Yes          |
| Subjects (matching)  | 638561  | 7  | 91223   | F (7, 21) = 4.191  | 0,0049  | **      | Yes          |
| Residual             | 457044  | 21 | 21764   |                    |         |         |              |
| Level 3              |         |    |         |                    |         |         |              |
| Interaction          | 32517   | 2  | 16258   | F (2, 14) = 0.2499 | 0,7823  | ns      | No           |
| Lateral Axe          | 2910455 | 2  | 1455227 | F (2, 14) = 22.37  | <0.0001 | ****    | Yes          |
| Genotype             | 1694583 | 1  | 1694583 | F (1, 7) = 17.97   | 0,0038  | **      | Yes          |
| Subjects (matching)  | 660285  | 7  | 94326   | F (7, 14) = 1.45   | 0,262   | ns      | No           |
| Residual             | 910860  | 14 | 65061   |                    |         |         |              |

| Sidak's multiple comparisons test                         | Mean 1 (control) | Mean 2 ( TSC1) | Mean Diff. | SE of diff. | 95.00% CI of diff. | N1 (control) | N2 ( TSC1) | t       | DF | Adjusted P Value | Summary | Significant? |
|-----------------------------------------------------------|------------------|----------------|------------|-------------|--------------------|--------------|------------|---------|----|------------------|---------|--------------|
| Delta Np73 <sup>Cre/+</sup> - Delta Np73Cre/+>TSC1lox/del |                  |                |            |             |                    |              |            |         |    |                  |         |              |
| Level 1                                                   |                  |                |            |             |                    |              |            |         |    |                  |         |              |
| ACA ( control vs TSC1)                                    | 980              | 1656           | -675.6     | 140         | -1048 to -303.1    | 5            | 4          | 4.827   | 28 | 0.0002           | ***     | Yes          |
| MOs ( control vs TSC1)                                    | 369              | 371.4          | -2.356     | 140         | -374.9 to 370.1    | 5            | 4          | 0.01683 | 28 | >0.9999          | ns      | No           |
| MOp( control vs TSC1)                                     | 201.2            | 356.3          | -155.1     | 140         | -527.6 to 217.4    | 5            | 4          | 1.108   | 28 | 0.7271           | ns      | No           |
| SSp ( control vs TSC1)                                    | 104.3            | 296.2          | -192       | 140         | -564.5 to 180.5    | 5            | 4          | 1.371   | 28 | 0.5504           | ns      | No           |
| Level 2                                                   |                  |                |            |             |                    |              |            |         |    |                  |         |              |
| RSP-MO ( control vs TSC1)                                 | 467.5            | 895.7          | -428.2     | 132.7       | -781.4 to -75.1    | 5            | 4          | 3.227   | 28 | 0.0126           | *       | Yes          |
| SSp ( control vs TSC1)                                    | 247.9            | 262.7          | -14.81     | 132.7       | -368 to 338.3      | 5            | 4          | 0.1116  | 28 | >0.9999          | ns      | No           |
| SSp-bfd( control vs TSC1)                                 | 150.1            | 508.2          | -358       | 132.7       | -711.2 to -4.874   | 5            | 4          | 2.698   | 28 | 0.0459           | *       | Yes          |
| SSs-AUD ( control vs TSC1)                                | 205.5            | 467.8          | -262.3     | 132.7       | -615.5 to 90.85    | 5            | 4          | 1.977   | 28 | 0.2126           | ns      | No           |
| Level 3                                                   |                  |                |            |             |                    |              |            |         |    |                  |         |              |
| RSP ( control vs TSC1)                                    | 945.7            | 1548           | -602.7     | 183.5       | -1079 to -126.8    | 5            | 4          | 3.285   | 21 | 0.0106           | *       | Yes          |
| VIS ( control vs TSC1)                                    | 242.9            | 691.9          | -449       | 183.5       | -924.9 to 26.88    | 5            | 4          | 2.447   | 21 | 0.0682           | ns      | No           |
| AUD ( control vs TSC1)                                    | 439.3            | 900.1          | -460.8     | 183.5       | -936.7 to 15.09    | 5            | 4          | 2.511   | 21 | 0.0596           | ns      | No           |



# control vs PTEN\*

| Multiple t-test           | Mean 1 (control) | Mean 2 (PTEN) | Difference | SE of difference | t ratio | df | P value | Summary | Significant? |
|---------------------------|------------------|---------------|------------|------------------|---------|----|---------|---------|--------------|
| Level 1                   |                  |               |            |                  |         |    |         |         |              |
| ACA (control vs PTEN)     | 980              | 3005          | 2025       | 582.4            | 3.476   | 10 | 0,0059  | ##      | Yes          |
| MOs (control vs PTEN)     | 369              | 1084          | 714.5      | 258.8            | 2.761   | 10 | 0,0201  | #       | Yes          |
| MOp (control vs PTEN)     | 201.2            | 821.9         | 620.7      | 233.8            | 2.655   | 10 | 0,0241  | #       | Yes          |
| SSp (control vs PTEN)     | 104.3            | 666.1         | 561.8      | 128.8            | 4.361   | 10 | 0,0014  | ##      | Yes          |
| Level 2                   |                  |               |            |                  |         |    |         |         |              |
| RSP-MO (control vs PTEN)  | 205.5            | 2057          | 1851       | 234.1            | 7.909   | 10 | <0.0001 | ####    | Yes          |
| SSp (control vs PTEN)     | 150.1            | 1276          | 1126       | 219.1            | 5.137   | 10 | 0,0004  | ###     | Yes          |
| SSp-bfd (control vs PTEN) | 467.5            | 2459          | 1991       | 444.6            | 4.479   | 10 | 0,0011  | ##      | Yes          |
| SSs-AUD (control vs PTEN) | 247.9            | 1421          | 1173       | 339.4            | 3.457   | 10 | 0,0061  | ##      | Yes          |
| Level 3                   |                  |               |            |                  |         |    |         |         |              |
| RSP (control vs PTEN)     | 945.7            | 3358          | 2412       | 680.6            | 3.544   | 10 | 0,0053  | ##      | Yes          |
| VIS (control vs PTEN)     | 242.9            | 1253          | 1010       | 289.3            | 3.491   | 10 | 0,0058  | ##      | Yes          |
| AUD (control vs PTEN)     | 439.3            | 1651          | 1211       | 302.4            | 4.005   | 10 | 0,0024  | ##      | Yes          |

# PTEN vs TSC1\*

| Multiple t-test        | Mean 1 (PTEN) | Mean 2 (TSC1) | Difference | SE of difference | t ratio | df | P value | Summary | Significant? |
|------------------------|---------------|---------------|------------|------------------|---------|----|---------|---------|--------------|
| Level 1                |               |               |            |                  |         |    |         |         |              |
| ACA (TSC1 vs PTEN)     | 3005          | 1656          | 1349       | 653.8            | 2.063   | 9  | 0,0691  | *       | Yes          |
| MOs (TSC1 vs PTEN)     | 1084          | 371.4         | 712.2      | 295              | 2.414   | 9  | 0,0389  | *       | Yes          |
| MOp (TSC1 vs PTEN)     | 821.9         | 356.3         | 465.6      | 276.3            | 1.685   | 9  | 0,1261  | ns      | No           |
| SSp (TSC1 vs PTEN)     | 666.1         | 296.2         | 369.9      | 146.2            | 2.53    | 9  | 0,0322  | *       | Yes          |
| Level 2                |               |               |            |                  |         |    |         |         |              |
| RSP-MO (TSC1 vs PTEN)  | 2459          | 895.7         | 1563       | 517.6            | 3.02    | 9  | 0,0144  | *       | Yes          |
| SSp (TSC1 vs PTEN)     | 1421          | 262.7         | 1159       | 381.6            | 3.036   | 9  | 0,0141  | *       | Yes          |
| SSp-bfd (TSC1 vs PTEN) | 1276          | 508.2         | 767.6      | 250.5            | 3.064   | 9  | 0,0134  | *       | Yes          |
| SSs-AUD (TSC1 vs PTEN) | 2057          | 467.8         | 1589       | 267.6            | 5.938   | 9  | 0,0002  | ***     | Yes          |
| Level 3                |               |               |            |                  |         |    |         |         |              |
| RSP (TSC1 vs PTEN)     | 3358          | 1548          | 1809       | 791.4            | 2.286   | 9  | 0,048   | *       | Yes          |
| VIS (TSC1 vs PTEN)     | 1253          | 691.9         | 561        | 324.2            | 1.731   | 9  | 0,1175  | ns      | No           |
| AUD (TSC1 vs PTEN)     | 1651          | 900.1         | 750.5      | 338.1            | 2.22    | 9  | 0,0535  | *       | Yes          |

\* Due to unequal variance (larger variation in pten mutants) we used mutiple-t-test to compare Pten data to either control ot Tsc1

ROSTRO-CAUDAL AXE

Quantification of CR fold changes in three neocortex levels : Control vs Mutants (Table 4.1)

|         | PIK3CA     | TSC1        | PTEN        |
|---------|------------|-------------|-------------|
|         | Mean ± SD  | Mean ± SD   | Mean ± SD   |
| Level 1 | 2.6 ± 6.07 | 1.7 ± 2.33  | 3.64 ± 1.40 |
| Level 2 | 4.1 ± 3.01 | 2.03 ± 7.59 | 6.65 ± 2.08 |
| Level 3 | 2.6 ± 4.88 | 1.89 ± 4.20 | 3.63 ± 1.32 |

| One sample t test | Theoretical mean | Actual mean | Discrepancy | 95% CI of discrepancy | t. df        | Std. Deviation | Std. Error of Mean | Lower 95% CI of mean | Upper 95% CI of mean | Sum   | number of values | P value (two tailed) | Significant |
|-------------------|------------------|-------------|-------------|-----------------------|--------------|----------------|--------------------|----------------------|----------------------|-------|------------------|----------------------|-------------|
| Level 1           |                  |             |             |                       |              |                |                    |                      |                      |       |                  |                      |             |
| PIK3CA            | 1                | 2.638       | 1.638       | 0.6722 to 2.605       | t=5.396 df=3 | 0.6072         | 0.3036             | 1.672                | 3.605                | 10.55 | 4                | 0.0125               | Yes         |
| TSC1              | 1                | 1.747       | 0.7474      | 0.3764 to 1.118       | t=6.412 df=3 | 0.2331         | 0.1166             | 1.376                | 2.118                | 6.99  | 4                | 0.0077               | Yes         |
| PTEN              | 1                | 3.645       | 2.645       | 1.347 to 3.942        | t=4.986 df=6 | 1.403          | 0.5303             | 2.347                | 4.942                | 25.51 | 7                | 0.0025               | Yes         |
| Level 2           |                  |             |             |                       |              |                |                    |                      |                      |       |                  |                      |             |
| PIK3CA            | 1                | 4.154       | 3.154       | 2.676 to 3.632        | t=20.99 df=3 | 0.3006         | 0.1503             | 3.676                | 4.632                | 16.62 | 4                | 0.0002               | Yes         |
| TSC1              | 1                | 2.027       | 1.027       | -0.1807 to 2.234      | t=2.706 df=3 | 0.7588         | 0.3794             | 0.8193               | 3.234                | 8.107 | 4                | 0.0734               | No          |
| PTEN              | 1                | 6.652       | 5.652       | 3.732 to 7.571        | t=7.204 df=6 | 2.076          | 0.7845             | 4.732                | 8.571                | 46.56 | 7                | 0.0004               | Yes         |
| Level 3           |                  |             |             |                       |              |                |                    |                      |                      |       |                  |                      |             |
| PIK3CA            | 1                | 2.644       | 1.644       | 0.8672 to 2.421       | t=6.734 df=3 | 0.4883         | 0.2442             | 1.867                | 3.421                | 10.58 | 4                | 0.0067               | Yes         |
| TSC1              | 1                | 1.894       | 0.8938      | 0.2254 to 1.562       | t=4.255 df=3 | 0.42           | 0.21               | 1.225                | 2.562                | 7.575 | 4                | 0.0238               | Yes         |
| PTEN              | 1                | 3.633       | 2.633       | 1.414 to 3.852        | t=5.285 df=6 | 1.318          | 0.4981             | 2.414                | 4.852                | 25.43 | 7                | 0.0019               | Yes         |

Quantification of CR fold changes between levels in mutants

| RM one way ANOVA table | SS     | DF | MS      | F (DFn, DFd)              | P value | P value summary | Significant (alpha=0.05)? |
|------------------------|--------|----|---------|---------------------------|---------|-----------------|---------------------------|
| PIK3CA                 |        |    |         |                           |         |                 |                           |
| Level                  | 6.102  | 2  | 3.051   | F (1.174, 3.521) = 21.24  | 0.0127  | *               | Yes                       |
| Matching               | 1.231  | 3  | 0.4103  | F (3, 6) = 2.857          | 0.1268  | ns              | No                        |
| Residual (random)      | 0.8617 | 6  | 0.1436  |                           |         |                 |                           |
| Total                  | 8.195  | 11 |         |                           |         |                 |                           |
| TSC1                   |        |    |         |                           |         |                 |                           |
| Level                  | 0.1561 | 2  | 0.07806 | F (1.643, 4.929) = 0.7027 | 0.5121  | ns              | No                        |
| Matching               | 1.753  | 3  | 0.5844  | F (3, 6) = 5.26           | 0.0407  | *               | Yes                       |
| Residual (random)      | 0.6666 | 6  | 0.1111  |                           |         |                 |                           |
| Total                  | 2.576  | 11 |         |                           |         |                 |                           |
| PTEN                   |        |    |         |                           |         |                 |                           |
| Level                  | 42.37  | 2  | 21.18   | F (1.229, 7.371) = 39.1   | 0.0002  | ***             | Yes                       |
| Matching               | 41.58  | 6  | 6.931   | F (6, 12) = 12.79         | 0.0001  | ***             | Yes                       |
| Residual (random)      | 6.501  | 12 | 0.5418  |                           |         |                 |                           |
| Total                  | 90.45  | 20 |         |                           |         |                 |                           |

**MEDIO-LATERAL AXE in three neocortex levels**

Quantification of CR fold changes P24 \_ Control vs Mutants (Table 4.2)

|                | PIK3CA     | TSC1        | PTEN       |
|----------------|------------|-------------|------------|
|                | Mean ± SD  | Mean ± SD   | Mean ± SD  |
| <b>Level 1</b> |            |             |            |
| ACA            | 1.3± 0.4   | 1.6 ± 0.30  | 3.0 ± 1.28 |
| Mos            | 4.1 ± 1.08 | 1.0 ± 0.60  | 2.9 ± 1.50 |
| Mop            | 5.3 ± 3.07 | 1.7 ± 1.26  | 4.0 ± 2.53 |
| SSp            | 3.5 ± 0.79 | 2.84 ± 0.48 | 6.3 ± 2.72 |
| <b>Level 2</b> |            |             |            |
| RSP-MO         | 3.9± 0.29  | 1.9 ± 0.93  | 5.2 ± 2.06 |
| SSp            | 4.8 ± 0.58 | 1.0 ± 0.53  | 5.8 ± 3.0  |
| SSp-bfd        | 4.2 ± 0.78 | 3.3 ± 0.84  | 8.5 ± 3.20 |
| SSs-AUD        | 3.6 ± 0.58 | 2.2 ± 0.85  | 10.0± 2.47 |
| <b>Level 3</b> |            |             |            |
| RSP            | 2.5 ± 0.76 | 1.6± 0.60   | 3.5 ± 1.57 |
| VIS            | 4.4 ± 1.26 | 2.9 ± 0.50  | 5.1 ± 2.56 |
| AUD            | 1.9 ± 0.5  | 2.0 ± 0.18  | 3.8 ± 1.50 |

**Quantification of CR fold changes in the different areas of the level 1 P24 \_ Control vs Mutants**

| One sample t test | Theoretical mean | Actual mean | Discrepancy | 95% CI of discrepancy | t, df           | Std. Deviation | Std. Error of Mean | Lower 95% CI of mean | Upper 95% CI of mean | Sum   | Number of valid | P value (two tailed) | Significant (alpha=0.05)? | value summary |
|-------------------|------------------|-------------|-------------|-----------------------|-----------------|----------------|--------------------|----------------------|----------------------|-------|-----------------|----------------------|---------------------------|---------------|
| <b>ACA</b>        |                  |             |             |                       |                 |                |                    |                      |                      |       |                 |                      |                           |               |
| PIK3CA            | 1                | 1.377       | 0.3769      | -0.3876 to 1.141      | t=1.569, df=3   | 0.4805         | 0.2402             | 0.6124               | 2.141                | 5.508 | 4               | 0.2147               | No                        | ns            |
| TSC1              | 1                | 1.689       | 0.6894      | 0.1644 to 1.214       | t=4.179, df=3   | 0.3299         | 0.1649             | 1.164                | 2.214                | 6.758 | 4               | 0.025                | Yes                       | *             |
| PTEN              | 1                | 3.066       | 2.066       | 0.8796 to 3.252       | t=4.261, df=6   | 1.283          | 0.4848             | 1.88                 | 4.252                | 21.46 | 7               | 0.0053               | Yes                       | ##            |
| <b>Mos</b>        |                  |             |             |                       |                 |                |                    |                      |                      |       |                 |                      |                           |               |
| PIK3CA            | 1                | 4.175       | 3.175       | 1.455 to 4.896        | t=5.874, df=3   | 1.081          | 0.5405             | 2.455                | 5.896                | 16.7  | 4               | 0.0098               | Yes                       | **            |
| TSC1              | 1                | 1.006       | 0.006385    | -0.9446 to 0.9574     | t=0.02137, df=3 | 0.5977         | 0.2988             | 0.05539              | 1.957                | 4.026 | 4               | 0.9843               | No                        | ns            |
| PTEN              | 1                | 2.936       | 1.936       | 0.5454 to 3.327       | t=3.406, df=6   | 1.504          | 0.5685             | 1.545                | 4.327                | 20.55 | 7               | 0.0144               | Yes                       | #             |
| <b>Mop</b>        |                  |             |             |                       |                 |                |                    |                      |                      |       |                 |                      |                           |               |
| PIK3CA            | 1                | 5.366       | 4.366       | -0.5213 to 9.254      | t=2.843, df=3   | 3.071          | 1.536              | 0.4787               | 10.25                | 21.46 | 4               | 0.0655               | No                        | ns            |
| TSC1              | 1                | 1.771       | 0.771       | -1.232 to 2.774       | t=1.225, df=3   | 1.259          | 0.6295             | -0.2324              | 3.774                | 7.084 | 4               | 0.3081               | No                        | ns            |
| PTEN              | 1                | 4.085       | 3.085       | 0.7445 to 5.427       | t=3.225, df=6   | 2.531          | 0.9567             | 1.744                | 6.427                | 28.6  | 7               | 0.018                | Yes                       | #             |
| <b>SSp</b>        |                  |             |             |                       |                 |                |                    |                      |                      |       |                 |                      |                           |               |
| PIK3CA            | 1                | 3.538       | 2.538       | 1.278 to 3.799        | t=6.407, df=3   | 0.7924         | 0.3962             | 2.278                | 4.799                | 14.15 | 4               | 0.0077               | Yes                       | **            |
| TSC1              | 1                | 2.841       | 1.841       | 1.084 to 2.597        | t=7.744, df=3   | 0.4754         | 0.2377             | 2.084                | 3.597                | 11.36 | 4               | 0.0045               | Yes                       | **            |
| PTEN              | 1                | 6.388       | 5.388       | 2.873 to 7.902        | t=5.243, df=6   | 2.719          | 1.028              | 3.873                | 8.902                | 44.71 | 7               | 0.0019               | Yes                       | ##            |

**Quantification of CR fold changes between areas of of level 1 in mutants**

| RM one way ANOVA table | SS    | DF | MS     | F (DFn, DFd)             | P value | P value summary | Significant (alpha=0.05)? |
|------------------------|-------|----|--------|--------------------------|---------|-----------------|---------------------------|
| <b>PIK3CA</b>          |       |    |        |                          |         |                 |                           |
| Area                   | 33.58 | 3  | 11.19  | F (1,121, 3,364) = 5.416 | 0.0924  | ns              | No                        |
| Matching               | 15.78 | 3  | 5.261  | F (3, 9) = 2.546         | 0.1213  | ns              | No                        |
| Residual (random)      | 18.6  | 9  | 2.067  |                          |         |                 |                           |
| Total                  | 67.96 | 15 |        |                          |         |                 |                           |
| <b>TSC1</b>            |       |    |        |                          |         |                 |                           |
| Area                   | 6.893 | 3  | 2.298  | F (1,257, 3,770) = 4.086 | 0.1169  | ns              | No                        |
| Matching               | 1.771 | 3  | 0.5903 | F (3, 9) = 1.050         | 0.4169  | ns              | No                        |
| Residual (random)      | 5.061 | 9  | 0.5623 |                          |         |                 |                           |
| Total                  | 13.72 | 15 |        |                          |         |                 |                           |
| <b>PTEN</b>            |       |    |        |                          |         |                 |                           |
| Area                   | 53.59 | 3  | 17.86  | F (1,719, 10,31) = 5.743 | 0.0242  | *               | Yes                       |
| Matching               | 50.24 | 6  | 8.374  | F (6, 18) = 2.692        | 0.0481  | *               | Yes                       |
| Residual (random)      | 55.99 | 18 | 3.11   |                          |         |                 |                           |
| Total                  | 159.8 | 27 |        |                          |         |                 |                           |

Quantification of CR fold changes in the different areas of the level 2 P24 Control vs Mutants

| One sample t test | Theoretical mean | Actual mean | Discrepancy | 95% CI of discrepancy | t, df          | Std. Deviation | Std. Error of Mean | Lower 95% CI of mean | Upper 95% CI of mean | Sum   | Number of val | P value (two tailed) | Significant (alpha=0.05) | Value summary |
|-------------------|------------------|-------------|-------------|-----------------------|----------------|----------------|--------------------|----------------------|----------------------|-------|---------------|----------------------|--------------------------|---------------|
| <b>RSP-MO</b>     |                  |             |             |                       |                |                |                    |                      |                      |       |               |                      |                          |               |
| PIK3CA            | 1                | 4.807       | 3.807       | 2.896 to 4.718        | t=13.30, df=3  | 0.2832         | 0.1416             | 3.54                 | 4.441                | 15.96 | 4             | 0.0009               | Yes                      | ***           |
| TSC1              | 1                | 1.06        | 0.05973     | -0.7939 to 0.9134     | t=0.2227, df=3 | 0.9306         | 0.4653             | 0.4353               | 3.397                | 7.664 | 4             | 0.8381               | No                       | ns            |
| PTEN              | 1                | 5.734       | 4.734       | 1.974 to 7.493        | t=4.197, df=6  | 2.061          | 0.7789             | 3.354                | 7.166                | 36.82 | 7             | 0.0057               | Yes                      | ##            |
| <b>SSp</b>        |                  |             |             |                       |                |                |                    |                      |                      |       |               |                      |                          |               |
| PIK3CA            | 1                | 4.807       | 3.807       | 2.896 to 4.718        | t=13.30, df=3  | 0.5725         | 0.2862             | 3.896                | 5.718                | 19.23 | 4             | 0.0009               | Yes                      | ***           |
| TSC1              | 1                | 1.06        | 0.05973     | -0.7939 to 0.9134     | t=0.2227, df=3 | 0.5365         | 0.2682             | 0.2061               | 1.913                | 4.239 | 4             | 0.8381               | No                       | ns            |
| PTEN              | 1                | 5.734       | 4.734       | 1.974 to 7.493        | t=4.197, df=6  | 2.984          | 1.128              | 2.974                | 8.493                | 40.14 | 7             | 0.0057               | Yes                      | ##            |
| <b>SSp-bld</b>    |                  |             |             |                       |                |                |                    |                      |                      |       |               |                      |                          |               |
| PIK3CA            | 1                | 4.24        | 3.24        | 2.010 to 4.470        | t=8.383, df=3  | 0.773          | 0.3865             | 3.01                 | 5.47                 | 16.96 | 4             | 0.0036               | Yes                      | **            |
| TSC1              | 1                | 3.385       | 2.385       | 1.033 to 3.736        | t=5.617, df=3  | 0.8491         | 0.4245             | 2.033                | 4.736                | 13.54 | 4             | 0.0112               | Yes                      | *             |
| PTEN              | 1                | 8.497       | 7.497       | 4.533 to 10.46        | t=6.190, df=6  | 3.204          | 1.211              | 5.533                | 11.46                | 59.48 | 7             | 0.0008               | Yes                      | ###           |
| <b>SSs-AUD</b>    |                  |             |             |                       |                |                |                    |                      |                      |       |               |                      |                          |               |
| PIK3CA            | 1                | 3.698       | 2.698       | 1.777 to 3.619        | t=9.322, df=3  | 0.5789         | 0.2895             | 2.777                | 4.619                | 14.79 | 4             | 0.0026               | Yes                      | **            |
| TSC1              | 1                | 2.277       | 1.277       | -0.07697 to 2.630     | t=3.001, df=3  | 0.8507         | 0.4254             | 0.923                | 3.63                 | 9.107 | 4             | 0.0576               | No                       | ns            |
| PTEN              | 1                | 10.01       | 9.01        | 6.723 to 11.30        | t=9.640, df=6  | 2.473          | 0.9346             | 7.723                | 12.3                 | 70.07 | 7             | <0.0001              | Yes                      | ####          |

Quantification of CR fold changes between areas of of level 2 in mutants

| RM one way ANOVA table | SS    | DF | MS     | F (DFn, DFd)             | P value | P value summary | Significant (alpha=0.05)? |
|------------------------|-------|----|--------|--------------------------|---------|-----------------|---------------------------|
| <b>PIK3CA</b>          |       |    |        |                          |         |                 |                           |
| Area                   | 2.66  | 3  | 0.8866 | F (1.837, 5.511) = 3.410 | 0.1102  | ns              | No                        |
| Matching               | 1.682 | 3  | 0.5605 | F (3, 9) = 2.156         | 0.1632  | ns              | No                        |
| Residual (random)      | 2.34  | 9  | 0.26   |                          |         |                 |                           |
| Total                  | 6.682 | 15 |        |                          |         |                 |                           |
| <b>TSC1</b>            |       |    |        |                          |         |                 |                           |
| Area                   | 11.13 | 3  | 3.711  | F (2.361, 7.084) = 16.28 | 0.0019  | **              | Yes                       |
| Matching               | 5.743 | 3  | 1.914  | F (3, 9) = 8.398         | 0.0056  | **              | Yes                       |
| Residual (random)      | 2.052 | 9  | 0.228  |                          |         |                 |                           |
| Total                  | 18.93 | 15 |        |                          |         |                 |                           |
| <b>PTEN</b>            |       |    |        |                          |         |                 |                           |
| Area                   | 107.6 | 3  | 35.87  | F (2.004, 12.03) = 10.34 | 0.0024  | **              | Yes                       |
| Matching               | 114.7 | 6  | 19.12  | F (6, 18) = 5.512        | 0.0022  | **              | Yes                       |
| Residual (random)      | 62.46 | 18 | 3.47   |                          |         |                 |                           |
| Total                  | 284.8 | 27 |        |                          |         |                 |                           |

Quantification of CR fold changes in the different areas of the level 3 P24 Control vs Mutants

| One sample t test | Theoretical mean | Actual mean | Discrepancy | 95% CI of discrepancy | t, df         | Std. Deviation | Std. Error of Mean | Lower 95% CI of mean | Upper 95% CI of mean | Sum   | Number of val | P value (two tailed) | Significant (alpha=0.05) | Value summary |
|-------------------|------------------|-------------|-------------|-----------------------|---------------|----------------|--------------------|----------------------|----------------------|-------|---------------|----------------------|--------------------------|---------------|
| <b>RSP</b>        |                  |             |             |                       |               |                |                    |                      |                      |       |               |                      |                          |               |
| PIK3CA            | 1                | 4.403       | 3.403       | 1.398 to 5.408        | t=5.402, df=3 | 0.7687         | 0.3844             | 1.268                | 3.714                | 9.965 | 4             | 0.0124               | Yes                      | *             |
| TSC1              | 1                | 2.849       | 1.849       | 1.045 to 2.653        | t=7.318, df=3 | 0.64           | 0.32               | 0.6189               | 2.656                | 6.549 | 4             | 0.0053               | Yes                      | **            |
| PTEN              | 1                | 5.158       | 4.158       | 1.769 to 6.548        | t=4.259, df=6 | 1.571          | 0.5939             | 2.097                | 5.003                | 24.85 | 7             | 0.0053               | Yes                      | ##            |
| <b>VIS</b>        |                  |             |             |                       |               |                |                    |                      |                      |       |               |                      |                          |               |
| PIK3CA            | 1                | 4.403       | 3.403       | 1.398 to 5.408        | t=5.402, df=3 | 1.26           | 0.63               | 2.398                | 6.408                | 17.61 | 4             | 0.0124               | Yes                      | *             |
| TSC1              | 1                | 2.849       | 1.849       | 1.045 to 2.653        | t=7.318, df=3 | 0.5052         | 0.2526             | 2.045                | 3.653                | 11.39 | 4             | 0.0053               | Yes                      | **            |
| PTEN              | 1                | 5.158       | 4.158       | 1.769 to 6.548        | t=4.259, df=6 | 2.583          | 0.9764             | 2.769                | 7.548                | 36.11 | 7             | 0.0053               | Yes                      | ##            |
| <b>AUD</b>        |                  |             |             |                       |               |                |                    |                      |                      |       |               |                      |                          |               |
| PIK3CA            | 1                | 1.838       | 0.838       | 0.02454 to 1.651      | t=3.278, df=3 | 0.5112         | 0.2556             | 1.025                | 2.651                | 7.352 | 4             | 0.0465               | Yes                      | *             |
| TSC1              | 1                | 2.049       | 1.049       | 0.7625 to 1.335       | t=11.65, df=3 | 0.18           | 0.09001            | 1.763                | 2.335                | 8.196 | 4             | 0.0014               | Yes                      | **            |
| PTEN              | 1                | 3.757       | 2.757       | 1.371 to 4.143        | t=4.868, df=6 | 1.498          | 0.5664             | 2.371                | 5.143                | 26.3  | 7             | 0.0028               | Yes                      | ##            |

Quantification of CR fold changes between areas of of level 3 in mutants

| RM one way ANOVA table | SS     | DF | MS     | F (DFn, DFd)             | P value | P value summary | Significant (alpha=0.05)? |
|------------------------|--------|----|--------|--------------------------|---------|-----------------|---------------------------|
| <b>PIK3CA</b>          |        |    |        |                          |         |                 |                           |
| Area                   | 14.22  | 2  | 7.108  | F (1.167, 3.501) = 11.33 | 0.0333  | *               | Yes                       |
| Matching               | 3.554  | 3  | 1.185  | F (3, 6) = 1.888         | 0.2326  | ns              | No                        |
| Residual (random)      | 3.765  | 6  | 0.6276 |                          |         |                 |                           |
| Total                  | 21.54  | 11 |        |                          |         |                 |                           |
| <b>TSC1</b>            |        |    |        |                          |         |                 |                           |
| Area                   | 3.035  | 2  | 1.518  | F (1.124, 3.373) = 8.073 | 0.0563  | ns              | No                        |
| Matching               | 0.9639 | 3  | 0.3213 | F (3, 6) = 1.709         | 0.2637  | ns              | No                        |
| Residual (random)      | 1.128  | 6  | 0.188  |                          |         |                 |                           |
| Total                  | 5.127  | 11 |        |                          |         |                 |                           |
| <b>PTEN</b>            |        |    |        |                          |         |                 |                           |
| Area                   | 10.71  | 2  | 5.357  | F (1.447, 8.679) = 2.973 | 0.1127  | ns              | No                        |
| Matching               | 46.7   | 6  | 7.784  | F (6, 12) = 4.320        | 0.0150  | *               | Yes                       |
| Residual (random)      | 21.62  | 12 | 1.802  |                          |         |                 |                           |
| Total                  | 79.04  | 20 |        |                          |         |                 |                           |

Quantification of cortical layer thickness in the S1bfd (Table 4.3) of mutants and control at P24 (Table S4.3)

|           | Control (n=4) | PIK3CA (n=4) | TSC1 (n=4)  | PTEN (n=5)  |
|-----------|---------------|--------------|-------------|-------------|
|           | Mean ± SD     | Mean ± SD    | Mean ± SD   | Mean ± SD   |
| Layer 1   | 92.9± 9.8     | 124.3± 14.8  | 91.8± 9.8   | 88.2 ±8.5   |
| Layer 2/3 | 351.9± 39.9   | 318.3± 33.9  | 332.1± 32.8 | 308.4± 18.8 |
| Layer 4   | 179.5± 20.5   | 166.8± 16.7  | 160.9± 22.1 | 172.8 ±9.7  |
| Layer 5   | 310.2± 24.1   | 270.3± 37.3  | 272.4± 24.4 | 285.7 ±12.1 |
| Layer 6   | 328.4± 29.0   | 341.7± 57.6  | 345.8± 34.2 | 319.8 ±29.7 |

| Multiple t-test PIK3CA vs. Ct | P value         | Mean of PIK3CA | Mean of Control | Difference | SE of difference | t ratio | df | q value  |
|-------------------------------|-----------------|----------------|-----------------|------------|------------------|---------|----|----------|
| Layer 1                       | <b>0,012558</b> | 124,3          | 92,99           | 31,28      | 8,893            | 3,517   | 6  | 0,06342  |
| Layer 2/3                     | 0,247213        | 318,3          | 351,9           | -33,56     | 26,18            | 1,282   | 6  | 0,416141 |
| Layer 4                       | 0,371403        | 166,8          | 179,6           | -12,8      | 13,25            | 0,9659  | 6  | 0,468896 |
| Layer 5                       | 0,122642        | 270,3          | 310,2           | -39,95     | 22,25            | 1,796   | 6  | 0,309672 |
| Layer 6                       | 0,696166        | 341,7          | 328,4           | 13,22      | 32,27            | 0,4098  | 6  | 0,703127 |

| Multiple t-test TSC1 vs. Ct | P value  | Mean of TSC1 | Mean of Control | Difference | SE of difference | t ratio | df | q value  |
|-----------------------------|----------|--------------|-----------------|------------|------------------|---------|----|----------|
| Layer 1                     | 0,875045 | 91,85        | 92,99           | -1,137     | 6,93             | 0,1641  | 6  | 0,883795 |
| Layer 2/3                   | 0,47313  | 332,1        | 351,9           | -19,76     | 25,82            | 0,7653  | 6  | 0,597326 |
| Layer 4                     | 0,263559 | 161          | 179,6           | -18,63     | 15,1             | 1,233   | 6  | 0,597326 |
| Layer 5                     | 0,069817 | 272,4        | 310,2           | -37,82     | 17,17            | 2,203   | 6  | 0,352573 |
| Layer 6                     | 0,468796 | 345,8        | 328,4           | 17,35      | 22,44            | 0,7731  | 6  | 0,597326 |

| Multiple t-test PTEN vs. Ct | P value  | Mean of PTEN | Mean of Control | Difference | SE of difference | t ratio | df | q value  |
|-----------------------------|----------|--------------|-----------------|------------|------------------|---------|----|----------|
| Layer 1                     | 0,465568 | 88,27        | 92,99           | -4,721     | 6,117            | 0,7717  | 7  | 0,677928 |
| Layer 2/3                   | 0,065961 | 308,5        | 351,9           | -43,42     | 19,95            | 2,177   | 7  | 0,21681  |
| Layer 4                     | 0,536973 | 172,9        | 179,6           | -6,682     | 10,29            | 0,6491  | 7  | 0,677928 |
| Layer 5                     | 0,085866 | 285,7        | 310,2           | -24,51     | 12,27            | 1,998   | 7  | 0,21681  |
| Layer 6                     | 0,676575 | 319,9        | 328,4           | -8,588     | 19,74            | 0,4351  | 7  | 0,683341 |

Quantification of tdT positive CR volume (Table 5.1)

|                          | Control           | PTEN               |
|--------------------------|-------------------|--------------------|
|                          | Mean $\pm$ SD     | Mean $\pm$ SD      |
| volume (control vs PTEN) | 382.5 $\pm$ 221.5 | 1144.5 $\pm$ 644.4 |

| Mann-Whitney U test      | Two-tailed p value | U   | Significant (alpha=0.05)? | P value summary |
|--------------------------|--------------------|-----|---------------------------|-----------------|
| volume (control vs PTEN) | <0.0001            | 128 | Yes                       | ****            |

Quantification of Reelin intensity in tdT positive CRs (Table 5.2)

|                                  | Control            | PTEN              |                           |                 |
|----------------------------------|--------------------|-------------------|---------------------------|-----------------|
|                                  | Mean $\pm$ SD      | Mean $\pm$ SD     |                           |                 |
| RLEN intensity (control vs PTEN) | 176 $\pm$ 93.87    | 348.8 $\pm$ 246.3 |                           |                 |
| Mann-Whitney U test              | Two-tailed p value | U                 | Significant (alpha=0.05)? | P value summary |
| RLEN intensity (control vs PTEN) | 0,0026             | 442               | Yes                       | **              |
|                                  |                    |                   |                           |                 |
|                                  |                    |                   |                           |                 |

**Quantification of CR intrinsic properties in the layer one above the SSp-bfd (Table 6.1)**

Mean  $\pm$  SEM

| Intrinsic Properties | Control (n=14)    | PTEN (n=12)        | paired t -test (p value) |
|----------------------|-------------------|--------------------|--------------------------|
| Vm (mV)              | -50.3 $\pm$ 0.43  | -46.7 $\pm$ 0.88   | 0.0095                   |
| Rm (MOhms)           | 1290.7 $\pm$ 98.8 | 745.65 $\pm$ 152.5 | 0.0379                   |
| Cm (pF)              | 21.15 $\pm$ 1.06  | 48.34 $\pm$ 2.23   | < 0.0001                 |

**Quantification of CR Action potentials in the layer one above the SSp-bfd (Table 6.2)**

**Action Potentials (AP)**

| Frequency | Control (n=14)  | PTEN (n=12)     | anova 2 ways |
|-----------|-----------------|-----------------|--------------|
| 10        | 0 $\pm$ 0       | 0 $\pm$ 0       | >0.9999      |
| 20        | 1.7 $\pm$ 1.28  | 0.42 $\pm$ 0.42 | >0.9999      |
| 30        | 5.8 $\pm$ 2.30  | 2 $\pm$ 1.17    | 0.9788       |
| 40        | 8.9 $\pm$ 2.53  | 7 $\pm$ 1.70    | >0.9999      |
| 50        | 9.36 $\pm$ 2.15 | 11.4 $\pm$ 2.11 | >0.9999      |
| 60        | 10 $\pm$ 2.41   | 15.4 $\pm$ 2.51 | 0.9105       |
| 70        | 11.4 $\pm$ 3.13 | 20.2 $\pm$ 2.32 | 0.2774       |
| 80        | 12.4 $\pm$ 3.37 | 23.3 $\pm$ 2.35 | 0.0427       |
| 90        | 13.5 $\pm$ 4.08 | 27.1 $\pm$ 2.46 | 0.0069       |
| 100       | 15.4 $\pm$ 5.07 | 29.7 $\pm$ 2.49 | 0.0039       |
| 110       | 15.2 $\pm$ 5.74 | 32.8 $\pm$ 2.31 | 0.001        |
| 120       | 17.1 $\pm$ 5.24 | 34.3 $\pm$ 1.91 | 0.0002       |

| Amplitude (mV) | Control (n=14)  | PTEN (n=12)     | anova 2 ways |
|----------------|-----------------|-----------------|--------------|
| 1              | 1.2 $\pm$ 2.22  | 77.3 $\pm$ 1.73 | P < 0.0001   |
| 2              | 44.9 $\pm$ 1.84 | 74.6 $\pm$ 2.03 | P < 0.0001   |
| 3              | 41.7 $\pm$ 2.79 | 73.5 $\pm$ 2.08 | P < 0.0001   |
| 4              | 40.0 $\pm$ 2.45 | 72.4 $\pm$ 2.38 | P < 0.0001   |
| 5              | 36.5 $\pm$ 2.56 | 71.9 $\pm$ 2.47 | P < 0.0001   |

|                | Control (n=14)    | PTEN (n=12)       | paired t -test (p value) |
|----------------|-------------------|-------------------|--------------------------|
| Threshold (mV) | -41.05 $\pm$ 5.47 | -44.505 $\pm$ 1.2 | 0.0434                   |
| Halfwidth (ms) | 2.65 $\pm$ 0.11   | 1.53 $\pm$ 0.05   | 0.0001                   |
| Latency (ms)   | 98.138 $\pm$ 23.6 | 246.2 $\pm$ 36.3  | 0.0128                   |

Quantification of the extra-cellular reelin signal intensity in layer 1 of the future S1 cortex in PTEN cKO and control mice at P1 (Table 7.1)

|                         | Control | PTEN  |
|-------------------------|---------|-------|
| Mean                    | 229,9   | 354,1 |
| SD                      | 133,6   | 213   |
| n (4 mice*4 ROI/layerI) | 16      | 16    |

|                                     |             |
|-------------------------------------|-------------|
| Mann Whitney test                   |             |
| P value                             | 0,0938      |
| Exact or approximate P value?       | Exact       |
| P value summary                     | ns          |
| Significantly different (P < 0.05)? | No          |
| One- or two-tailed P value?         | Two-tailed  |
| Sum of ranks in column A,B          | 219 , 309   |
| Mann-Whitney U                      | 83          |
|                                     |             |
| Difference between medians          |             |
| Median of Control                   | 194.2, n=16 |
| Median of PTEN                      | 262.9, n=16 |
| Difference: Actual                  | 68,65       |
| Difference: Hodges-Lehmann          | 94,12       |



## Quantification of the reelin expression and cleavage in cortex from PTEN cKO and control mice at P7-P8 (Table 7.2)

| <b>Reelin Expression (FL+N-R6+N-R2)/Pan-Cadherin</b> |                   |
|------------------------------------------------------|-------------------|
| Unpaired t test                                      |                   |
| P value                                              | 0,43              |
| P value summary                                      | ns                |
| Significantly different (P < 0.05)?                  | No                |
| One- or two-tailed P value?                          | Two-tailed        |
| t, df                                                | t=0.8459, df=6    |
| How big is the difference?                           |                   |
| Mean of Control                                      | 1,425             |
| Mean of PTEN                                         | 1,615             |
| Difference between means (B - A) ± SEM               | 0.1900 ± 0.2246   |
| 95% confidence interval                              | -0.3596 to 0.7396 |
| R squared (eta squared)                              | 0,1066            |
| F test to compare variances                          |                   |
| F, DFn, Dfd                                          | 1.682, 3, 3       |
| P value                                              | 0,6796            |
| P value summary                                      | ns                |
| Significantly different (P < 0.05)?                  | No                |
| Data analyzed                                        |                   |
| Sample size, control                                 | 4                 |
| Sample size, PTEN                                    | 4                 |

| <b>Reelin cleavage (N-R6+N-R2)/(FL+N-R6+N-R2)</b> |                     |
|---------------------------------------------------|---------------------|
| Unpaired t test                                   |                     |
| P value                                           | <b>0,0355</b>       |
| P value summary                                   | *                   |
| Significantly different (P < 0.05)?               | Yes                 |
| One- or two-tailed P value?                       | Two-tailed          |
| t, df                                             | t=2.702, df=6       |
| How big is the difference?                        |                     |
| Mean of control                                   | 0,9975              |
| Mean of PTEN                                      | 0,86                |
| Difference between means (B - A) ± SEM            | -0.1375 ± 0.05089   |
| 95% confidence interval                           | -0.2620 to -0.01298 |
| R squared (eta squared)                           | 0,5489              |
| F test to compare variances                       |                     |
| F, DFn, Dfd                                       | 1.967, 3, 3         |
| P value                                           | 0,5926              |
| P value summary                                   | ns                  |
| Significantly different (P < 0.05)?               | No                  |
| Data analyzed                                     |                     |
| Sample size, control                              | 4                   |
| Sample size, PTEN                                 | 4                   |

# Quantification of the pS6 signal intensity in cortex from PTEN cKO and control mice at P1 (Table 7.3)

|                                       |                      |         |                              |                   |          |
|---------------------------------------|----------------------|---------|------------------------------|-------------------|----------|
| Two-way ANOVA                         | Ordinary             |         |                              |                   |          |
| Alpha                                 | 0,05                 |         |                              |                   |          |
|                                       |                      |         |                              |                   |          |
| Source of Variation                   | % of total variation | P value | P value summary              | Significant?      |          |
| Interaction                           | 11,59                | 0,266   | ns                           | No                |          |
| bin                                   | 28,95                | 0,0033  | **                           | Yes               |          |
| genotype                              | 2,249                | 0,1398  | ns                           | No                |          |
|                                       |                      |         |                              |                   |          |
| ANOVA table                           | SS (Type III)        | DF      | MS                           | F (DFn, DFd)      | P value  |
| Interaction                           | 289753               | 9       | 32195                        | F (9, 57) = 1.283 | P=0.2660 |
| bin                                   | 724038               | 9       | 80449                        | F (9, 57) = 3.207 | P=0.0033 |
| genotype                              | 56238                | 1       | 56238                        | F (1, 57) = 2.242 | P=0.1398 |
| Residual                              | 1429844              | 57      | 25085                        |                   |          |
|                                       |                      |         |                              |                   |          |
| Difference between column means       |                      |         |                              |                   |          |
| Predicted (LS) mean of Lima           | 200                  |         |                              |                   |          |
| Predicted (LS) mean of Rolling-Stones | 254,3                |         |                              |                   |          |
| Difference between predicted means    | -54,34               |         |                              |                   |          |
| SE of difference                      | 36,29                |         |                              |                   |          |
| 95% CI of difference                  | -127.0 to 18.33      |         |                              |                   |          |
|                                       |                      |         |                              |                   |          |
| Normality of Residuals                |                      |         |                              |                   |          |
| Test name                             | Statistics           | P value | Passed normality test (alpha | P value summary   |          |
| Anderson-Darling (A2*)                | 0,6291               | 0,0976  | Yes                          | ns                |          |
| D'Agostino-Pearson omnibus (K2)       | 1,396                | 0,4977  | Yes                          | ns                |          |
| Shapiro-Wilk (W)                      | 0,9716               | 0,0821  | Yes                          | ns                |          |
| Kolmogorov-Smirnov (distance)         | 0,07658              | 0,1     | Yes                          | ns                |          |

Quantification of the burst and seizures neuronal network activity in S1 cortex in adult PTEN cKO and control mice (Table 7.4)

| Type of activity    |                |            |                           |                 |
|---------------------|----------------|------------|---------------------------|-----------------|
| Fisher's exact test | <i>p</i> value | odds ratio | Significant (alpha=0.05)? | P value summary |
| two-sided           | 1              | 0,9231     | No                        | ns              |

| Burst properties |                           |         |          |                  |                   |                           |                 |
|------------------|---------------------------|---------|----------|------------------|-------------------|---------------------------|-----------------|
| unpaired t-test  | <i>Two-tailed p</i> value | N (CTR) | N (PTEN) | (CTR) Mean ± SEM | (PTEN) Mean ± SEM | Significant (alpha=0.05)? | P value summary |
| burst frequency  | 0.9739                    | 13      | 14       | 4.735 ± 0.7335   | 4.776 ± 0.9932    | No                        | ns              |
| burst duration   | 0.5072                    | 13      | 14       | 1.651 ± 0.1791   | 1.854 ± 0.2398    | No                        | ns              |

Behavior analysis of adult PTEN cKO and control mice (Table 8.1)

Y-Maze Spontaneous Alternation

| D'Agostino & Pearson normality test | K2     | P value | Passed normality test (alpha=0) | P value summary |
|-------------------------------------|--------|---------|---------------------------------|-----------------|
| Control Female                      | 0.8746 | 0.6458  | Yes                             | ns              |
| PTEN Female                         | 3.64   | 0.162   | Yes                             | ns              |
| Control Male                        | 0.3284 | 0.8486  | Yes                             | ns              |
| PTEN Male                           | 1.706  | 0.426   | Yes                             | ns              |

| One sample t test | Theoretical mean | Actual mean | Discrepancy | 5% CI of discrepand | t. df          | P value (two tailed) | Significant (alpha=0.05)? |
|-------------------|------------------|-------------|-------------|---------------------|----------------|----------------------|---------------------------|
| Control Female    | 50               | 60.8        | 10.8        | 7.398 to 14.19      | t=6.628. df=20 | <0.0001              | Yes                       |
| PTEN Female       | 50               | 63.69       | 13.69       | 8.162 to 19.22      | t=5.251. df=16 | <0.0001              | Yes                       |
| Control Male      | 50               | 61.13       | 11.13       | 6.126 to 16.13      | t=4.742. df=15 | 0.0003               | Yes                       |
| PTEN Male         | 50               | 60.84       | 10.84       | 6.972 to 14.72      | t=5.937. df=16 | <0.0001              | Yes                       |

Vertical activity

| Two ways ANOVA table | SS (Type III) | DF | MS     | F (DFn, DFd)       | P value | P value summary | Significant? |
|----------------------|---------------|----|--------|--------------------|---------|-----------------|--------------|
| Rearing 10 minutes   |               |    |        |                    |         |                 |              |
| Interaction          | 636           | 1  | 636    | F (1, 59) = 0.6630 | 0.4188  | ns              | No           |
| sex                  | 216.9         | 1  | 216.9  | F (1, 59) = 0.2261 | 0.6362  | ns              | No           |
| genotype             | 3798          | 1  | 3798   | F (1, 59) = 3.960  | 0.0512  | ns              | No           |
| Residual             | 56595         | 59 | 959.2  |                    |         |                 |              |
| Rearing 50 minutes   |               |    |        |                    |         |                 |              |
| Interaction          | 4029          | 1  | 4029   | F (1, 59) = 0.1807 | 0.6723  | ns              | No           |
| sex                  | 7668          | 1  | 7668   | F (1, 59) = 0.3439 | 0.5598  | ns              | No           |
| genotype             | 110553        | 1  | 110553 | F (1, 59) = 4.958  | 0.0298  | *               | Yes          |
| Residual             | 1315485       | 59 | 22296  |                    |         |                 |              |

| Sidak's multiple comparisons test | Mean 1 (Control) | Mean 2 (PTEN) | Mean Diff. | SE of diff. | 95.00% CI of diff. | N1 (Control) | N2 (PTEN) | t      | DF | justed P Val | Summary | Significant? |
|-----------------------------------|------------------|---------------|------------|-------------|--------------------|--------------|-----------|--------|----|--------------|---------|--------------|
| Rearing 10 minutes                |                  |               |            |             |                    |              |           |        |    |              |         |              |
| Female Control vs PTEN            | 98.27            | 76.35         | 21.91      | 10.97       | -3.264 to 47.09    | 15           | 17        | 1.997  | 59 | 0.0983       | ns      | No           |
| Male Control vs PTEN              | 88.19            | 79            | 9.188      | 11.13       | -16.36 to 34.73    | 16           | 15        | 0.8254 | 59 | 0.6548       | ns      | No           |
| Rearing 50 minutes                |                  |               |            |             |                    |              |           |        |    |              |         |              |
| Female Control vs PTEN            | 399.7            | 299.8         | 99.91      | 52.9        | -21.47 to 221.3    | 15           | 17        | 1.889  | 59 | 0.1236       | ns      | No           |
| Male Control vs PTEN              | 405.8            | 337.9         | 67.88      | 53.67       | -55.27 to 191      | 16           | 15        | 1.265  | 59 | 0.3773       | ns      | No           |

Horizontal Activity

| Multiple t-test                   | Mean 1 (Control) | Mean 2 (PTEN) | Difference | SE of difference | t ratio | df | P value | Summary | Significant? |
|-----------------------------------|------------------|---------------|------------|------------------|---------|----|---------|---------|--------------|
| Rearing Total Activity 10 minutes |                  |               |            |                  |         |    |         |         |              |
| Female                            | 3334             | 2768          | 566.4      | 327.6            | 1.729   | 35 | 0,0926  | ns      | No           |
| Male                              | 2632             | 2266          | 366        | 324.5            | 1.128   | 29 | 0,2685  | ns      | No           |

Rearing Total Activity 50 minutes

| Two way anova ANOVA table | SS (Type III) | DF | MS       | F (DFn, DFd)         | P value | P value summary | Significant? |
|---------------------------|---------------|----|----------|----------------------|---------|-----------------|--------------|
| Interaction               | 16947         | 1  | 16947    | F (1, 64) = 0.002143 | 0.9632  | ns              | No           |
| Sex                       | 14897559      | 1  | 14897559 | F (1, 64) = 1.884    | 0.1747  | ns              | No           |
| genotype                  | 26471199      | 1  | 26471199 | F (1, 64) = 3.347    | 0.0720  | ns              | No           |
| Residual                  | 506177882     | 64 | 7909029  |                      |         |                 |              |

Open field (OF)

OF Entry center

| Two way anova ANOVA table | SS (Type III) | DF | MS    | F (DFn, DFd)        | P value | P value summary | Significant? |
|---------------------------|---------------|----|-------|---------------------|---------|-----------------|--------------|
| Entry center 10min        |               |    |       |                     |         |                 |              |
| Interaction               | 16.49         | 1  | 16.49 | F (1, 64) = 0.08432 | 0.7725  | ns              | No           |
| Gender                    | 48.45         | 1  | 48.45 | F (1, 64) = 0.2478  | 0.6203  | ns              | No           |
| Genotype                  | 440.1         | 1  | 440.1 | F (1, 64) = 2.251   | 0.1385  | ns              | No           |
| Residual                  | 12514         | 64 | 195.5 |                     |         |                 |              |
| Entry center 30 min       |               |    |       |                     |         |                 |              |
| Interaction               | 46.78         | 1  | 46.78 | F (1, 64) = 0.05762 | 0.8111  | ns              | No           |
| Gender                    | 1593          | 1  | 1593  | F (1, 64) = 1.962   | 0.1661  | ns              | No           |
| Genotype                  | 671.2         | 1  | 671.2 | F (1, 64) = 0.8267  | 0.3666  | ns              | No           |
| Residual                  | 51957         | 64 | 811.8 |                     |         |                 |              |
| Entry center 1 h          |               |    |       |                     |         |                 |              |
| Interaction               | 916.2         | 1  | 916.2 | F (1, 64) = 0.3509  | 0.5557  | ns              | No           |
| Gender                    | 2793          | 1  | 2793  | F (1, 64) = 1.070   | 0.3048  | ns              | No           |
| Genotype                  | 8166          | 1  | 8166  | F (1, 64) = 3.128   | 0.0817  | ns              | No           |
| Residual                  | 167075        | 64 | 2611  |                     |         |                 |              |

OF Total distance

| Two way anova ANOVA table | SS (Type III) | DF | MS       | F (DFn, DFd)         | P value | P value summary | Significant? |
|---------------------------|---------------|----|----------|----------------------|---------|-----------------|--------------|
| OF Total distance 10min   |               |    |          |                      |         |                 |              |
| Interaction               | 618196        | 1  | 618196   | F (1, 65) = 0.3654   | 0.5476  | ns              | No           |
| Gender                    | 6834416       | 1  | 6834416  | F (1, 65) = 4.040    | 0.0486  | *               | Yes          |
| Genotype                  | 566385        | 1  | 566385   | F (1, 65) = 0.3348   | 0.5648  | ns              | No           |
| Residual                  | 109960040     | 65 | 1691693  |                      |         |                 |              |
| OF Total distance 30 min  |               |    |          |                      |         |                 |              |
| Interaction               | 3908881       | 1  | 3908881  | F (1, 65) = 0.613    | 0.4365  | ns              | No           |
| Gender                    | 6979313       | 1  | 6979313  | F (1, 65) = 1.094    | 0.2994  | ns              | No           |
| Genotype                  | 527564        | 1  | 527564   | F (1, 65) = 0.08273  | 0.7745  | ns              | No           |
| Residual                  | 414506258     | 65 | 6377019  |                      |         |                 |              |
| OF Total distance 1 h     |               |    |          |                      |         |                 |              |
| Interaction               | 17653         | 1  | 17653    | F (1, 64) = 0.001169 | 0.9728  | ns              | No           |
| Gender                    | 4229173       | 1  | 4229173  | F (1, 64) = 0.2800   | 0.5985  | ns              | No           |
| Genotype                  | 41825240      | 1  | 41825240 | F (1, 64) = 2.769    | 0.1010  | ns              | No           |
| Residual                  | 966690114     | 64 | 15104533 |                      |         |                 |              |

OF Time in the center

| Two way anova ANOVA table | SS (Type III) | DF | MS    | F (DFn, DFd)        | P value | P value summary | Significant? |
|---------------------------|---------------|----|-------|---------------------|---------|-----------------|--------------|
| OF Time center 10 min     |               |    |       |                     |         |                 |              |
| Interaction               | 63.08         | 1  | 63.08 | F (1, 63) = 0.1705  | 0.6811  | ns              | No           |
| Gender                    | 40.62         | 1  | 40.62 | F (1, 63) = 0.1098  | 0.7415  | ns              | No           |
| Genotype                  | 1556          | 1  | 1556  | F (1, 63) = 4.205   | 0.0445  | *               | Yes          |
| Residual                  | 23310         | 63 | 370   |                     |         |                 |              |
| OF Time center 30 min     |               |    |       |                     |         |                 |              |
| Interaction               | 395.3         | 1  | 395.3 | F (1, 65) = 0.08740 | 0.7685  | ns              | No           |
| Gender                    | 3738          | 1  | 3738  | F (1, 65) = 0.8263  | 0.3667  | ns              | No           |
| Genotype                  | 3772          | 1  | 3772  | F (1, 65) = 0.8339  | 0.3645  | ns              | No           |
| Residual                  | 293999        | 65 | 4523  |                     |         |                 |              |
| OF Time center 1h min     |               |    |       |                     |         |                 |              |
| Interaction               | 4576          | 1  | 4576  | F (1, 64) = 0.3073  | 0.5813  | ns              | No           |
| Gender                    | 26821         | 1  | 26821 | F (1, 64) = 1.801   | 0.1843  | ns              | No           |
| Genotype                  | 10887         | 1  | 10887 | F (1, 64) = 0.7311  | 0.3957  | ns              | No           |
| Residual                  | 953003        | 64 | 14891 |                     |         |                 |              |

| Sidak's multiple comparisons test | Mean 1 F | Mean 2 M | Mean Diff. | SE of diff. | 95.00% CI of diff. | N1 | N2 | t       | DF | justed P Va | Summary | Significant? |
|-----------------------------------|----------|----------|------------|-------------|--------------------|----|----|---------|----|-------------|---------|--------------|
| Behavior OF Time center 10 min    |          |          |            |             |                    |    |    |         |    |             |         |              |
| PTEN                              | 46.11    | 49.62    | -3.511     | 6.814       | -19.12 to 12.10    | 17 | 15 | 0.5153  | 63 | 0.8465      | ns      | No           |
| Control                           | 57.73    | 57.35    | 0.3847     | 6.527       | -14.57 to 15.34    | 19 | 16 | 0.05895 | 63 | 0.9978      | ns      | No           |

OF ratio Center to total distance

| Two way anova ANOVA table | SS (Type III) | DF | MS          | F (DFn, DFd)         | P value | P value summary | Significant? |
|---------------------------|---------------|----|-------------|----------------------|---------|-----------------|--------------|
| OF ratio 10 min           |               |    |             |                      |         |                 |              |
| Interaction               | 0.00003316    | 1  | 0.00003316  | F (1, 64) = 0.02689  | 0.8703  | ns              | No           |
| Gender                    | 0.000005945   | 1  | 0.000005945 | F (1, 64) = 0.004821 | 0.9449  | ns              | No           |
| Genotype                  | 0.007357      | 1  | 0.007357    | F (1, 64) = 5.966    | 0.0174  | *               | Yes          |
| Residual                  | 0.07892       | 64 | 0.001233    |                      |         |                 |              |
| OF ratio 30 min           |               |    |             |                      |         |                 |              |
| Interaction               | 0.00001148    | 1  | 0.00001148  | F (1, 65) = 0.01041  | 0.9191  | ns              | No           |
| Gender                    | 0.001375      | 1  | 0.001375    | F (1, 65) = 1.247    | 0.2682  | ns              | No           |
| Genotype                  | 0.001847      | 1  | 0.001847    | F (1, 65) = 1.675    | 0.2001  | ns              | No           |
| Residual                  | 0.07168       | 65 | 0.001103    |                      |         |                 |              |
| OF ratio 1h min           |               |    |             |                      |         |                 |              |
| Interaction               | 0.00001209    | 1  | 0.00001209  | F (1, 65) = 0.01495  | 0.9030  | ns              | No           |
| Gender                    | 0.0005724     | 1  | 0.0005724   | F (1, 65) = 0.7078   | 0.4033  | ns              | No           |
| Genotype                  | 0.003107      | 1  | 0.003107    | F (1, 65) = 3.843    | 0.0543  | ns              | No           |
| Residual                  | 0.05257       | 65 | 0.0008087   |                      |         |                 |              |

| Sidak's multiple comparisons test | Mean 1 F | Mean 2 M | Mean Diff. | SE of diff. | 95.00% CI of diff.  | N1 | N2 | t       | DF | justed P Va | Summary | Significant? |
|-----------------------------------|----------|----------|------------|-------------|---------------------|----|----|---------|----|-------------|---------|--------------|
| Behavior OF ratio 10 min          |          |          |            |             |                     |    |    |         |    |             |         |              |
| PTEN                              | 0.132    | 0.13     | 0.001999   | 0.01244     | -0.02649 to 0.03049 | 17 | 15 | 0.1607  | 64 | 0.9838      | ns      | No           |
| Control                           | 0.1515   | 0.1523   | -0.00081   | 0.01178     | -0.02778 to 0.02616 | 20 | 16 | 0.06877 | 64 | 0.997       | ns      | No           |

**Sensitivity of adult PTEN or pik3CA mutants to kainate induced seizures compared to controls (Table 8.2)**

| <b>PTEN</b>                 |                    |        |                     |             |                  |          |                           |                 |
|-----------------------------|--------------------|--------|---------------------|-------------|------------------|----------|---------------------------|-----------------|
| Mann-Whitney U test         | Two-tailed p value | U      | (Control) Mean ± SD | N (Control) | (PTEN) Mean ± SD | N (PTEN) | Significant (alpha=0.05)? | P value summary |
| <b>latency (min)</b>        |                    |        |                     |             |                  |          |                           |                 |
| Females                     | 0,7835             | 16     | 26.2 ± 46.4         | 6           | 15.5 ± 27.2      | 6        | No                        | ns              |
| Males                       | 0,9697             | 15 1/2 | 36.6 ± 48.8         | 4           | 35.5 ± 49.9      | 8        | No                        | ns              |
| <b>Duration (min)</b>       |                    |        |                     |             |                  |          |                           |                 |
| Females                     | <b>0,0455</b>      | 5,5    | 35.7 ± 44.1         | 6           | 87.6 ± 33.2      | 6        | Yes                       | *               |
| Males                       | 0,802              | 14     | 18.7 ± 18.6         | 4           | 13.6 ± 13        | 8        | No                        | ns              |
| <b>Number of occurrence</b> |                    |        |                     |             |                  |          |                           |                 |
| Females                     | 0,4459             | 12,5   | 1.3 ± 1.0           | 6           | 2.2 ± 1.6        | 6        | No                        | ns              |
| Males                       | 0,6687             | 13     | 0.7 ± 0.5           | 4           | 1.0 ± 0.7        | 8        | No                        | ns              |

**PIK3CA**

| Mann-Whitney U test         | Two-tailed p value | U    | (Control) Mean ± SD | N (Control) | (PIK3CA) Mean ± SD | N (PIK3CA) | Significant (alpha=0.05)? | P value summary |
|-----------------------------|--------------------|------|---------------------|-------------|--------------------|------------|---------------------------|-----------------|
| <b>latency (min)</b>        |                    |      |                     |             |                    |            |                           |                 |
| Females                     | 0.753              | 24   | 17 ± 9.17           | 6           | 17.8 ± 9.34        | 9          | No                        | ns              |
| Males                       | 0.7902             | 22   | 86.0 ± 4.80 (10)    | 8           | 89.5 ± 4.73(10)    | 6          | No                        | ns              |
| <b>Duration (min)</b>       |                    |      |                     |             |                    |            |                           |                 |
| Females                     | <b>0.0076</b>      | 5    | 28.2± 2.51(10)      | 6           | 75.2 ± 3.04 (10)   | 9          | Yes                       | **              |
| Males                       | 0.7902             | 22   | 6.5 ± 1.09 (10)     | 8           | 17.05 ± 2.65 (10)  | 6          | No                        | ns              |
| <b>Number of occurrence</b> |                    |      |                     |             |                    |            |                           |                 |
| Females                     | 0.3794             | 19,5 | 1.8 ± 0.98          | 6           | 2.8 ± 2.02         | 9          | No                        | ns              |
| Males                       | 0.8741             | 22,5 | 2.1 ± 3.22          | 8           | 2.8 ± 4.40         | 6          | No                        | ns              |

**Sensitivity of adult PTEN or pik3CA mutants to kainate induced seizures compared to controls (Table 8.2)**

| <b>PTEN</b>                 |                    |        |                     |             |                  |          |                           |                 |
|-----------------------------|--------------------|--------|---------------------|-------------|------------------|----------|---------------------------|-----------------|
| Mann-Whitney U test         | Two-tailed p value | U      | (Control) Mean ± SD | N (Control) | (PTEN) Mean ± SD | N (PTEN) | Significant (alpha=0.05)? | P value summary |
| <b>latency (min)</b>        |                    |        |                     |             |                  |          |                           |                 |
| Females                     | 0,7835             | 16     | 26.2 ± 46.4         | 6           | 15.5 ± 27.2      | 6        | No                        | ns              |
| Males                       | 0,9697             | 15 1/2 | 36.6 ± 48.8         | 4           | 35.5 ± 49.9      | 8        | No                        | ns              |
| <b>Duration (min)</b>       |                    |        |                     |             |                  |          |                           |                 |
| Females                     | <b>0,0455</b>      | 5,5    | 35.7 ± 44.1         | 6           | 87.6 ± 33.2      | 6        | Yes                       | *               |
| Males                       | 0,802              | 14     | 18.7 ± 18.6         | 4           | 13.6 ± 13        | 8        | No                        | ns              |
| <b>Number of occurrence</b> |                    |        |                     |             |                  |          |                           |                 |
| Females                     | 0,4459             | 12,5   | 1.3 ± 1.0           | 6           | 2.2 ± 1.6        | 6        | No                        | ns              |
| Males                       | 0,6687             | 13     | 0.7 ± 0.5           | 4           | 1.0 ± 0.7        | 8        | No                        | ns              |

**PIK3CA**

| Mann-Whitney U test         | Two-tailed p value | U    | (Control) Mean ± SD | N (Control) | (PIK3CA) Mean ± SD | N (PIK3CA) | Significant (alpha=0.05)? | P value summary |
|-----------------------------|--------------------|------|---------------------|-------------|--------------------|------------|---------------------------|-----------------|
| <b>latency (min)</b>        |                    |      |                     |             |                    |            |                           |                 |
| Females                     | 0.753              | 24   | 17 ± 9.17           | 6           | 17.8 ± 9.34        | 9          | No                        | ns              |
| Males                       | 0.7902             | 22   | 86.0 ± 4.80 (10)    | 8           | 89.5 ± 4.73(10)    | 6          | No                        | ns              |
| <b>Duration (min)</b>       |                    |      |                     |             |                    |            |                           |                 |
| Females                     | <b>0.0076</b>      | 5    | 28.2± 2.51(10)      | 6           | 75.2 ± 3.04 (10)   | 9          | Yes                       | **              |
| Males                       | 0.7902             | 22   | 6.5 ± 1.09 (10)     | 8           | 17.05 ± 2.65 (10)  | 6          | No                        | ns              |
| <b>Number of occurrence</b> |                    |      |                     |             |                    |            |                           |                 |
| Females                     | 0.3794             | 19,5 | 1.8 ± 0.98          | 6           | 2.8 ± 2.02         | 9          | No                        | ns              |
| Males                       | 0.8741             | 22,5 | 2.1 ± 3.22          | 8           | 2.8 ± 4.40         | 6          | No                        | ns              |

**Table S9: Supplemental Material and Methods- list of reagents and softwares**

| Reagent type (species) or resource            | Designation                                   | Source or reference | Identifiers             | Additional information |
|-----------------------------------------------|-----------------------------------------------|---------------------|-------------------------|------------------------|
| <b>Strain Mus musculus (males and female)</b> | C57BL6J                                       | Janvier             |                         |                        |
| <b>Mus musculus (males and female)</b>        | $\Delta Np73^{CreIRESGFP}$                    | [20]                | $\Delta Np73^{Cre}$     |                        |
| <b>Mus musculus (males and female)</b>        | <i>ROSA26<sup>loxP-stop-loxP-Tomato</sup></i> | [38]                | R26 <sup>mT</sup>       |                        |
| <b>Mus musculus (males and female)</b>        | <i>R26StopFlp110*</i>                         | [24]                | PIK3CA <sup>p110*</sup> |                        |
| <b>Mus musculus (males and female)</b>        | <i>Pten<sup>loxP</sup></i>                    | [39]                | PTEN <sup>lox/lox</sup> |                        |
| <b>Mus musculus (males and female)</b>        | <i>TSC1<sup>loxP</sup></i>                    | [40]                | TSC1 <sup>del/lox</sup> |                        |



|                               |                                                                       |                 |             |                                                                                                                                                          |
|-------------------------------|-----------------------------------------------------------------------|-----------------|-------------|----------------------------------------------------------------------------------------------------------------------------------------------------------|
| <b>Sequence-based reagent</b> | ΔNp73 <sup>Cre/+</sup> genotyping<br>delta1<br><br>delta2<br><br>83RC | This Manuscript | PCR primers | delta1:<br><br>GAA-TGC-CAA-CTC-TCA-GTC-CG<br><br>delta2:<br><br>GTC-TCT-CTG-AAC-CCC-AAC-CA<br><br>83RC:<br><br>GGT-GTA-CGG-GCA-GTA-AAT-TGG-AC            |
| <b>Sequence-based reagent</b> | R26 <sup>mT</sup> genotyping<br>RCE-1<br><br>RCE-2<br><br>RCE-3       | This Manuscript | PCR primers | RCE-1:<br><br>CCC-AAA-GTC-GCT-CTG-AGT-TGT-TAT-C<br><br>RCE-2:<br><br>GAA-GGA-GCG-GGA-GAA-ATG-GAT-ATG<br><br>RCE-3:<br><br>CCA-GGC-GGG-CCA-TTT-ACC-GTA-AG |
| <b>Sequence-based reagent</b> | Rosap110* genotyping<br>RCE-1<br><br>RCE-2<br><br>NeoR1               | This Manuscript | PCR primers | RCE-1:<br><br>CCC-AAA-GTC-GCT-CTG-AGT-TGT-TAT-C<br><br>RCE-2:<br><br>GAA-GGA-GCG-GGA-GAA-ATG-GAT-ATG                                                     |

|                               |                                                        |                  |                                 |                                                                                                                                                           |
|-------------------------------|--------------------------------------------------------|------------------|---------------------------------|-----------------------------------------------------------------------------------------------------------------------------------------------------------|
|                               |                                                        |                  |                                 | NeoR1:<br><br>GAC-ATC-ATC-AAG-GAA-ACC-CTG-GAC                                                                                                             |
| <b>Sequence-based reagent</b> | PTEN genotyping<br>New_Sens<br><br>Del_AS<br><br>i5_S  | [39]             | PCR primers                     | New_Sens:<br><br>AGA-TTG-TAT-GTG-ATC-ATC-TGT-CAG-G<br><br>Del_AS:<br><br>AGC-AGG-TGA-AAG-AGA-AGT-ACA-G<br><br>i5_S:<br><br>ATT-AAA-TTT-GGA-CTT-GTG-CCC-CA |
| <b>Sequence-based reagent</b> | TSC1 genotyping<br><br>F4536<br><br>R4830<br><br>R6548 | [40]             | PCR primers                     | F4536:<br><br>AGG-AGG-CCT-CTT-CTG-CTA-CC<br><br>R4830:<br><br>CAG-CTC-CGA-CCA-TGA-AGT-G<br><br>R6548:<br><br>TGG-GTC-CTG-ACC-TAT-CTC-CTA                  |
| <b>Antibody</b>               | goat polyclonal IgG anti-reelin antibody               | R&D Systems, USA | Cat# AF3820,<br>RRID:AB_2253745 | IF(1:500)                                                                                                                                                 |

|                 |                                                                  |                                |                                    |             |
|-----------------|------------------------------------------------------------------|--------------------------------|------------------------------------|-------------|
|                 |                                                                  |                                |                                    |             |
| <b>Antibody</b> | mouse monoclonal IgG1 anti-reelin antibody (G10)                 | Millipore (Merck), USA         | Cat# MAB5364,<br>RRID: AB_11212203 | WB (1:500)  |
| <b>Antibody</b> | mouse monoclonal anti-panCadherin antibody (CH-19)               | Sigma-Aldrich, USA             | Cat# C1821,<br>RRID: AB_476826     | WB (1:1000) |
| <b>Antibody</b> | rabbit monoclonal anti-phospho-AKT Serine 473 antibody (D9E)     | Cell signaling Technology, USA | Cat# 4060,<br>RRID:AB_2315049      | IF(1:200)   |
| <b>Antibody</b> | rabbit monoclonal anti-phospho-S6 antibody (Ser 240/244) (D68F8) | Cell signaling Technology, USA | Cat# 5364,<br>RRID:AB_10694233     | IF(1:1000)  |
| <b>Antibody</b> | rat monoclonal anti-ctip2 antibody                               | Abcam, USA                     | Cat# ab18465,<br>RRID:AB_2064130   | IF(1:250)   |
| <b>Antibody</b> | rabbit polyclonal anti-cux1,2 antibody                           | Santa Cruz Biotechnology, USA  | Cat# sc13024,<br>RRID:AB_2261231   | IF(1:250)   |

|                 |                                      |                                          |                                       |              |
|-----------------|--------------------------------------|------------------------------------------|---------------------------------------|--------------|
| <b>Antibody</b> | donkey anti-rabbit Alexa-488         | Jackson ImmunoResearch Laboratories, USA | Cat# 711-545-152,<br>RRID: AB_2313584 | IF(1:500)    |
| <b>Antibody</b> | donkey anti-goat Alexa-488           | Molecular Probes, USA                    | Cat# A11055,<br>RRID:AB_2534102       | IF(1:500)    |
| <b>Antibody</b> | donkey anti-goat Cy5                 | Jackson ImmunoResearch Laboratories, USA | Cat# 705-175-147,<br>RRID: AB_2340415 | IF(1:250)    |
| <b>Antibody</b> | donkey anti-rat Alexa-Cy5            | Jackson ImmunoResearch Laboratories, USA | Cat# 712-175-153,<br>RRID: AB_2340672 | IF(1:250)    |
| <b>Antibody</b> | Polyclonal anti-mouse IgG, Fc<br>HRP | Jackson ImmunoResearch Laboratories, USA | Cat# 115-035-008,<br>RRID: AB_2313585 | WB(1:20 000) |

|                                |                                                       |                               |                              |            |
|--------------------------------|-------------------------------------------------------|-------------------------------|------------------------------|------------|
| <b>Antibody</b>                | Zenon® Alexa Fluor® 488 Rabbit IgG Labeling Kit       | Thermo Fisher Scientific, USA | Cat# Z25302, RRID:AB_2572214 |            |
| <b>Antibody</b>                | DAPI (4',6-Diamidino-2-Phenylindole, Dihydrochloride) | ThermoFisher Scientific, USA  | Cat# D1306, RRID:AB_2629482  | IF(1:1000) |
| <b>Antibody</b>                | Biocytin                                              | ThermoFisher Scientific, USA  | Cat#B1592                    |            |
| <b>Antibody</b>                | Streptavidin, Alexa Fluor™ 546 conjugate              | Thermo Fisher Scientific, USA | Cat#S11225 RRID:AB_2532130   |            |
| <b>Chemical compound, drug</b> | Vectashield                                           | Vector Laboratories, USA      | Cat# H1000, RRID:AB_2336789  |            |
| <b>Chemical compound, drug</b> | Normal Goat Serum (10%)                               | Thermo Fisher Scientific, USA | cat # 50062Z                 |            |

|                                |                                    |                               |                      |          |
|--------------------------------|------------------------------------|-------------------------------|----------------------|----------|
| <b>Chemical compound, drug</b> | ProLong™ Diamond Antifade Mountant | Thermo Fisher Scientific, USA | cat # P36970         |          |
| <b>Chemical compound, drug</b> | Triton 100X                        | Eurobio, France               | Cat# GAUTTR00-07     |          |
| <b>Chemical compound, drug</b> | Paraformaldehyde                   | Sigma-Aldrich, USA            | Cat# P6148           |          |
| <b>Chemical compound, drug</b> | Tissue Tek * OCT compound          | Sakura Finetek, USA           | Cat# NC1862249       |          |
| <b>Chemical compound, drug</b> | Gelatin from porcine skin          | Sigma-Aldrich, USA            | Cat# G2500           |          |
| <b>Chemical compound, drug</b> | Ketamine (Imalgen 1000)            | Centravet, Dinan, France      | GTIN: 03661103003199 | 180mg/kg |
| <b>Chemical compound, drug</b> | Xylasine (Rompun 2%)               | Centravet, Dinan, France      | GTIN: 04007221032311 | 10mg/kg  |

|                                |                          |                                          |                 |         |
|--------------------------------|--------------------------|------------------------------------------|-----------------|---------|
| <b>Chemical compound, drug</b> | Kainate                  | Bio-Techne, USA                          | Cat#0222/10     | 15mg/Kg |
| <b>Software, algorithm</b>     | ImageJ/FIJI              | National Institutes of Health (NIH), USA | RRID:SCR_002285 |         |
| <b>Software, algorithm</b>     | Adobe Photoshop CS6      | Adobe Inc., USA                          | RRID:SCR_014199 |         |
| <b>Software, algorithm</b>     | GraphPad Prism 8.0       | GraphPad Software, USA                   | RRID:SCR_000306 |         |
| <b>Software, algorithm</b>     | CorelDraw Graphics Suite | Corel Corporation , Canada               | RRID:SCR_014235 |         |
| <b>Software, algorithm</b>     | Axon™ pCLAMP® 9 Software | Molecular Devices, USA                   | RRID:SCR_011323 |         |
| <b>Software, algorithm</b>     | IGORpro                  | WaveMetric s Inc, USA                    | RRID:SCR_000325 |         |
| <b>Software, algorithm</b>     | TaroTools                | Jikei University School of               |                 |         |

|                                |                                                   |                                      |                 |  |
|--------------------------------|---------------------------------------------------|--------------------------------------|-----------------|--|
|                                |                                                   | Medicine,<br>Japan                   |                 |  |
| <b>Software,<br/>algorithm</b> | Axograph software                                 | Axograph<br>Inc, USA                 | RRID:SCR_014284 |  |
| <b>Software,<br/>algorithm</b> | MEA Monitor software                              | Multichann<br>el Systems,<br>Germany |                 |  |
| <b>Software,<br/>algorithm</b> | MC Rack 4.5.1 software                            | Multichann<br>el Systems,<br>Germany | RRID:SCR_014955 |  |
| <b>Software,<br/>algorithm</b> | Videotrack v2.6 Automated<br>Behavioural Analysis | ViewPoint,<br>France                 |                 |  |
| <b>Software,<br/>algorithm</b> | Image Lab Software, V6.1                          | Biorad,<br>France                    |                 |  |
