# Supplementary material for: Activation of the PI3K/AKT/mTOR Pathway in Cajal–Retzius Cells Leads to Their Survival and Increases Susceptibility to Kainate-Induced Seizures
Source: MDPI journal article supplement (doi:10.3390/ijms24065376), 2023-03-11
Supplement: s1 [file s1]

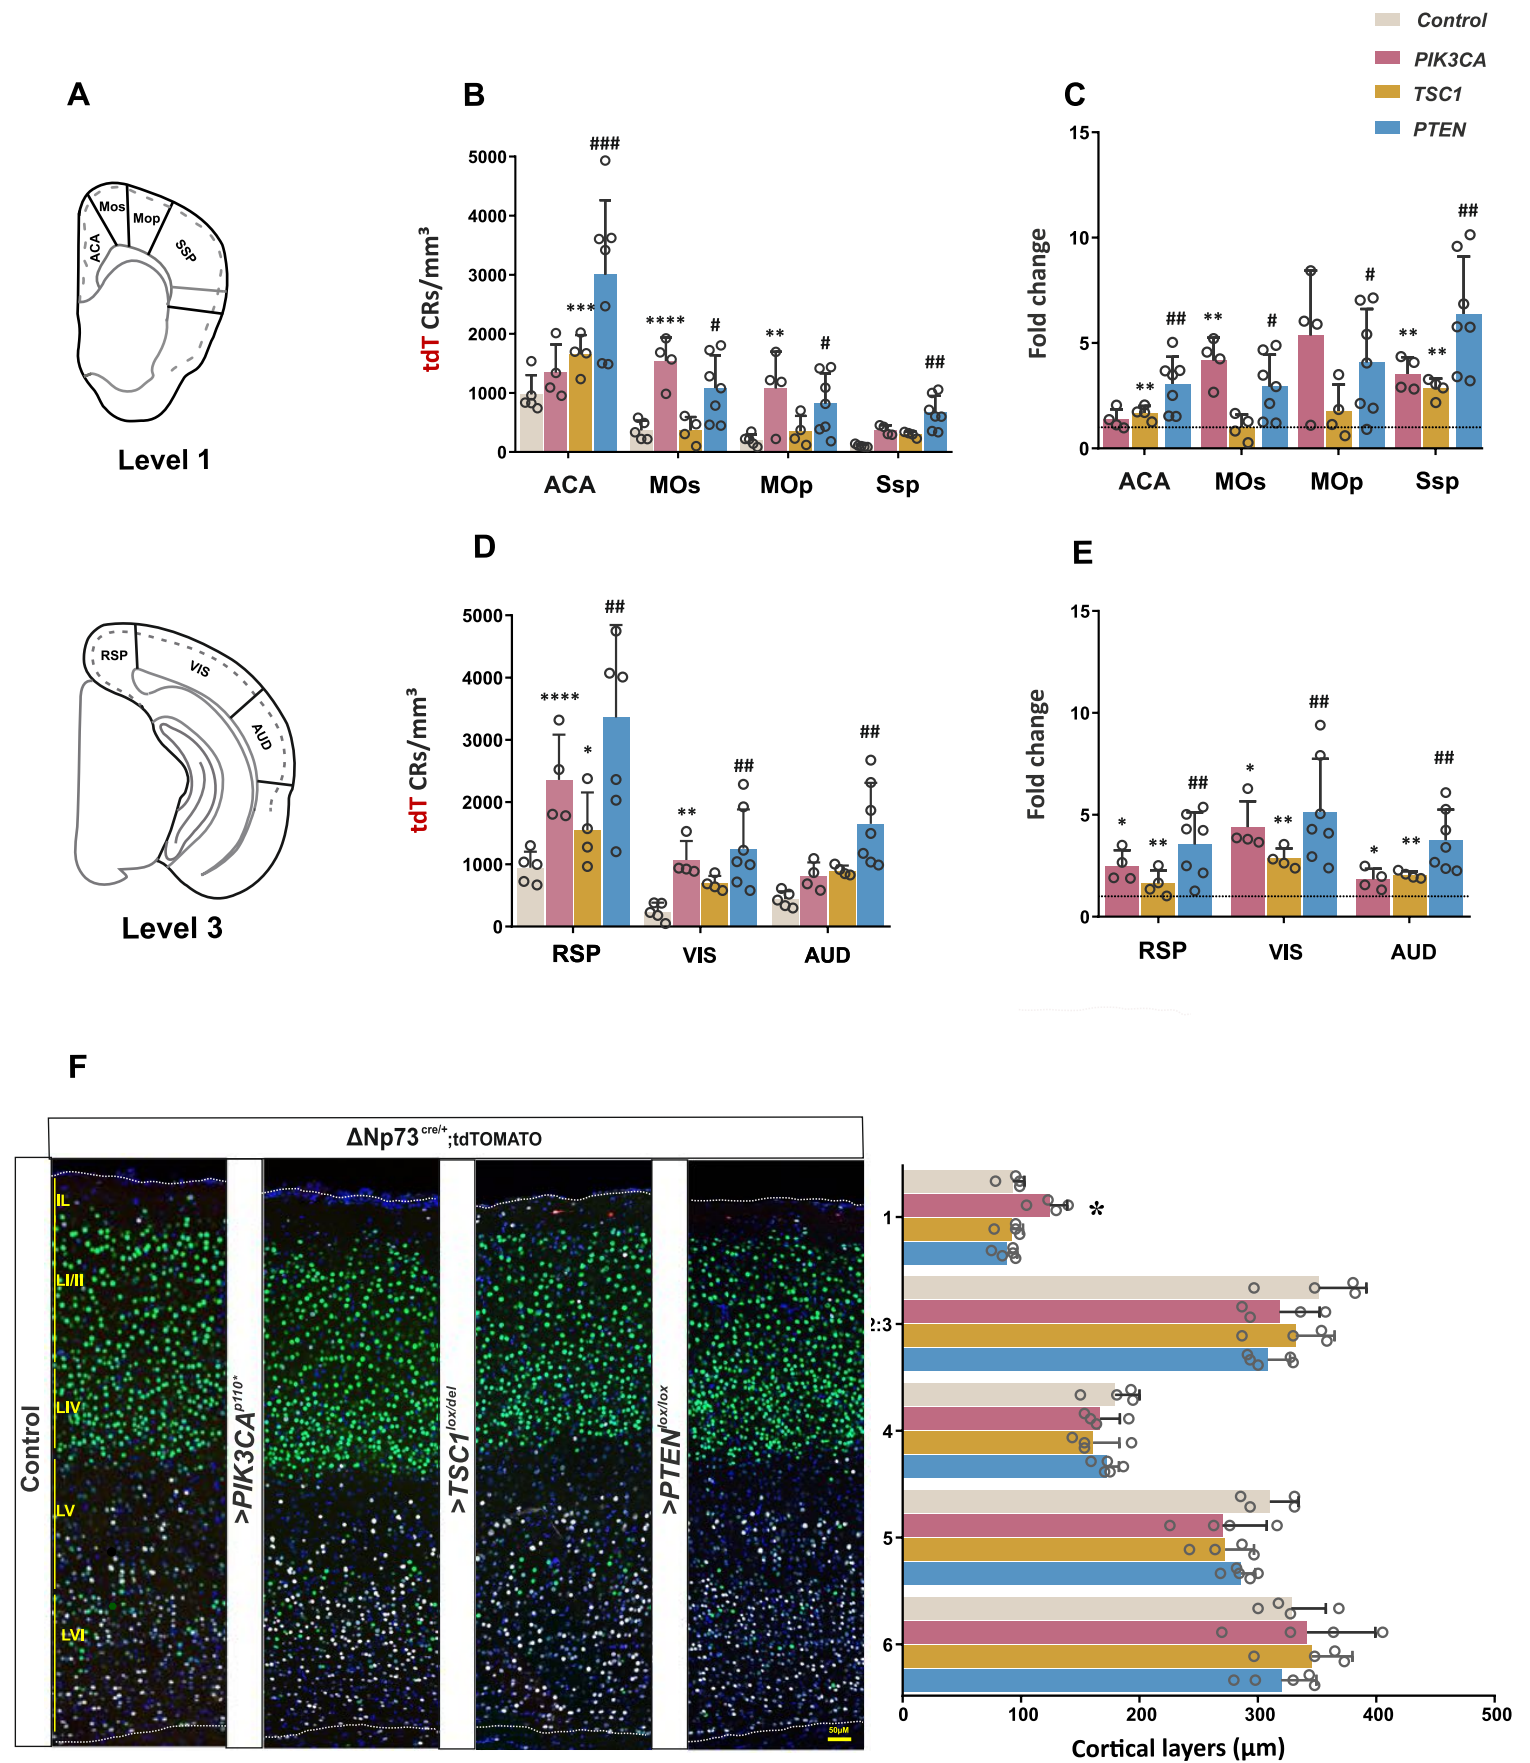

**Figure S3 - Persistence of CRs at P24 along medio-lateral axis in levels 1 and 3 after PI3K/ AKT/ mTOR pathway activation . Normal cortical lamination in the S1bf brain area of the PIK3CA, TSC1 and PTEN mutants (Level 2) .**
