# Supplementary material for: Activation of the PI3K/AKT/mTOR Pathway in Cajal–Retzius Cells Leads to Their Survival and Increases Susceptibility to Kainate-Induced Seizures
Source: MDPI journal article supplement (doi:10.3390/ijms24065376), 2023-03-11
Supplement: s1 [file s1]

**A**

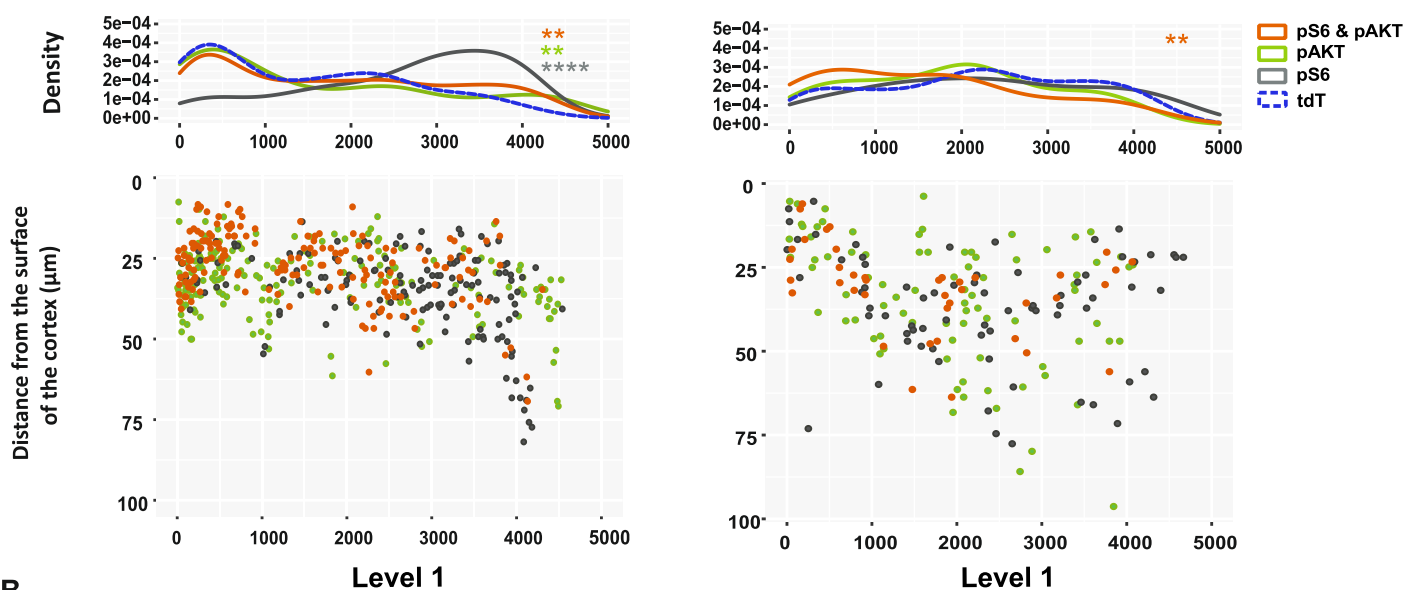

**B**

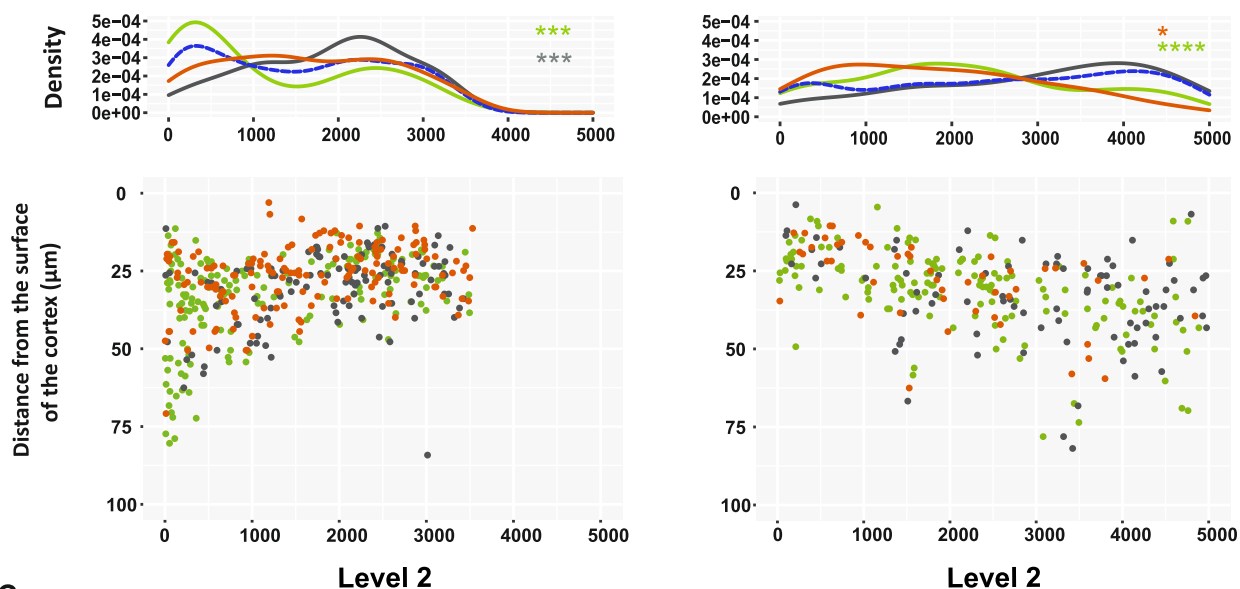

**C**

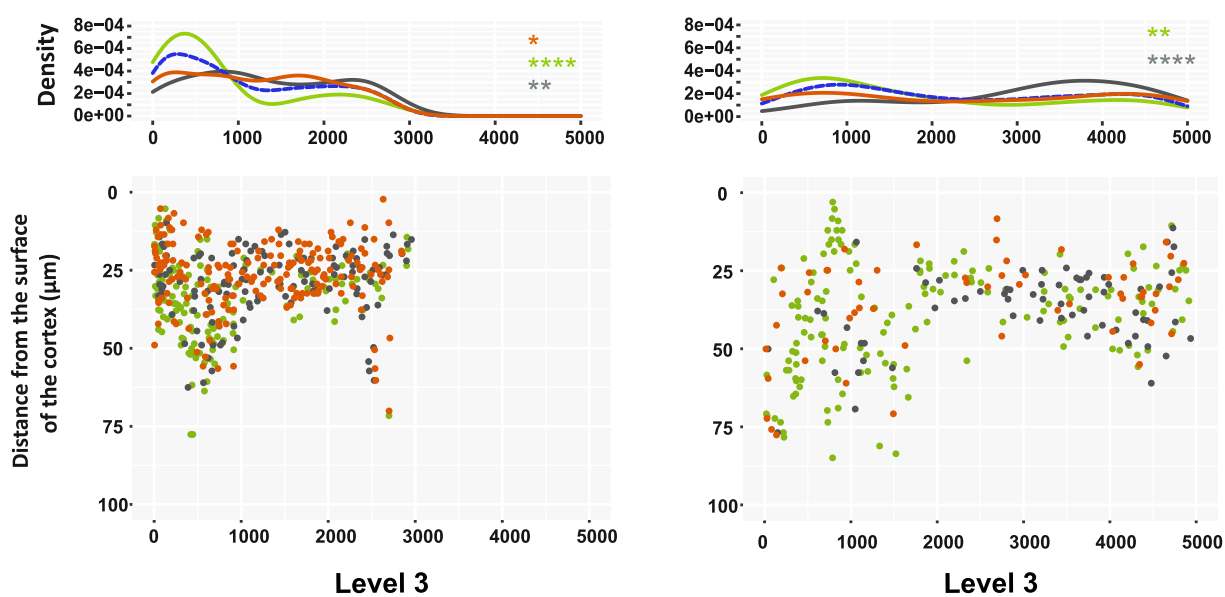

Distance from the medial cortex to the lateral cortex ( $\mu\text{m}$ )

**Figure S1 – Differential activity of the PI3K/AKT/mTOR pathway along the medio-lateral axis at 3 rostro-caudal levels in the neocortex at E17.5 and P1.**
