# Supplementary material for: Activation of the PI3K/AKT/mTOR Pathway in Cajal–Retzius Cells Leads to Their Survival and Increases Susceptibility to Kainate-Induced Seizures
Source: MDPI journal article supplement (doi:10.3390/ijms24065376), 2023-03-11
Supplement: s1 [file s1]

A

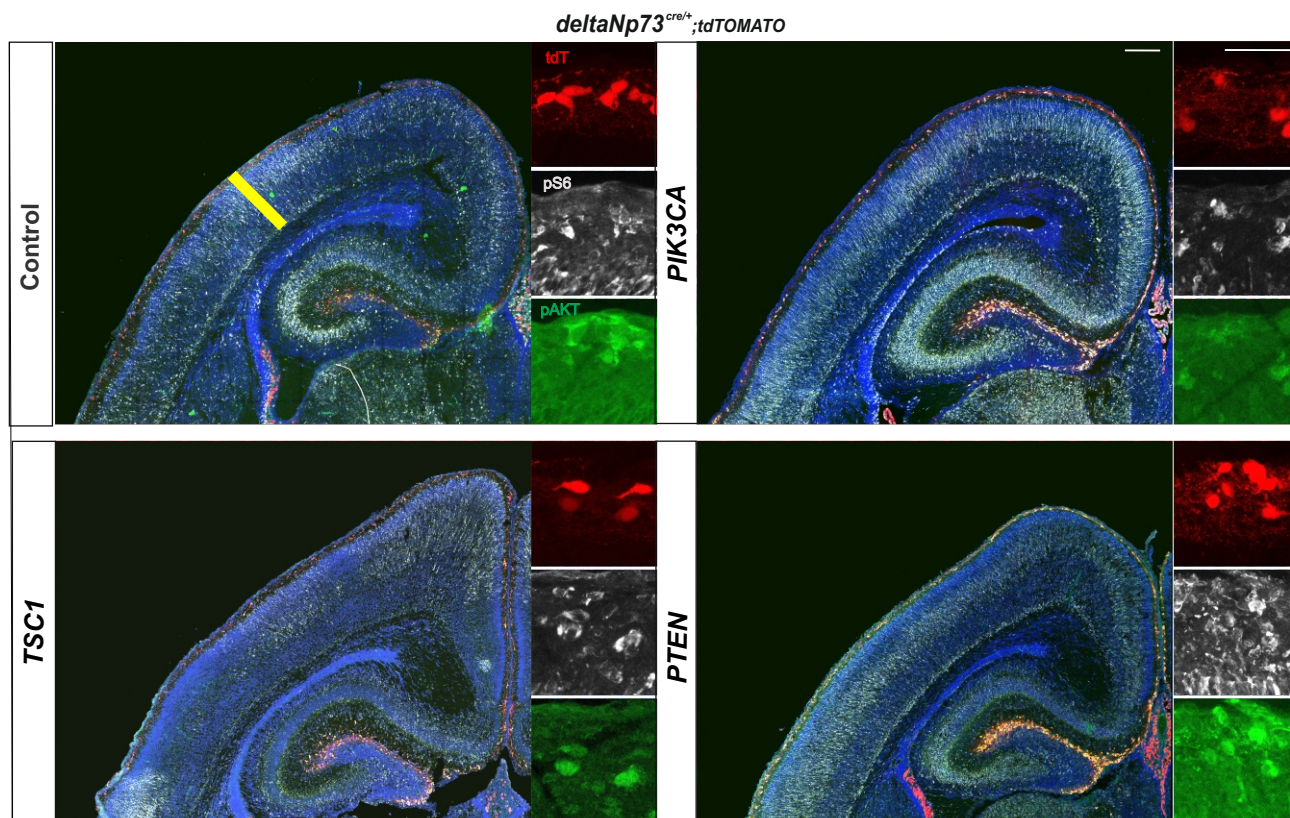

B

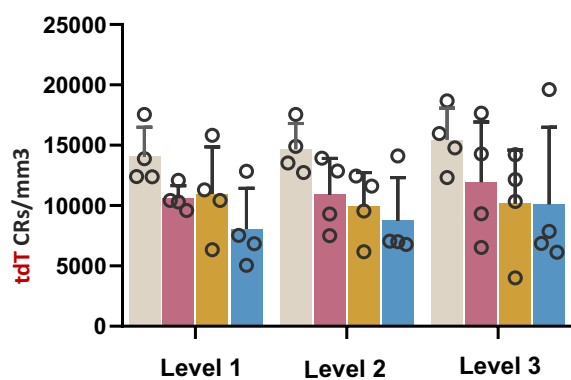

C

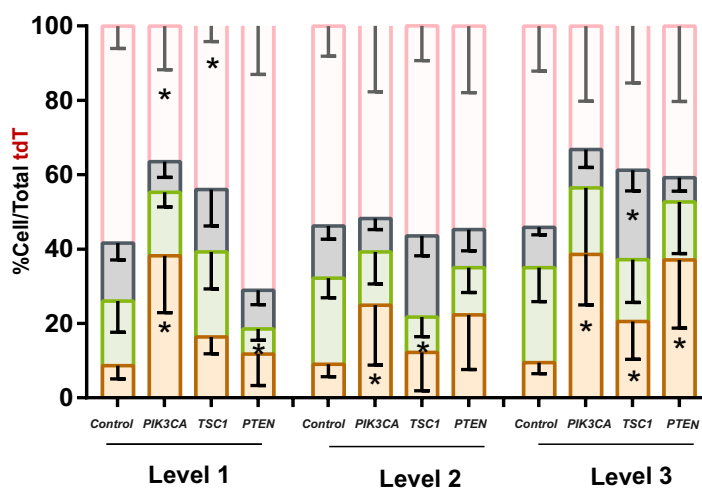

D

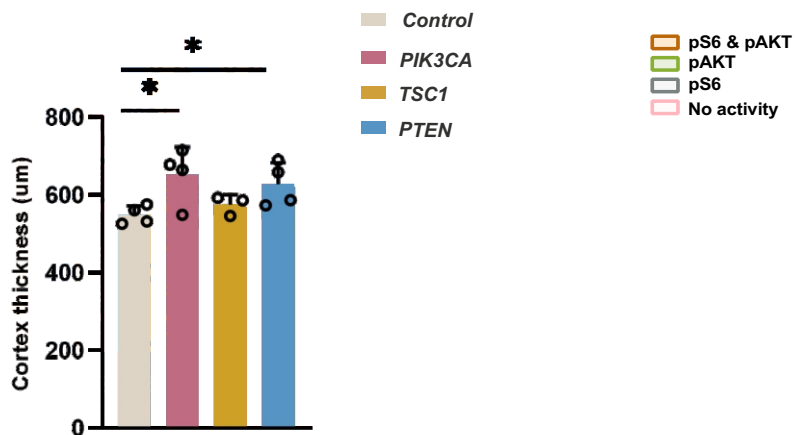

**Figure S2- Differential activation of the PIK3/AKT/mTOR pathway at P1 does not alter CR development at P1 stage but cortical thickness in mutants with AKT activation.**
