# Supplementary material for: Activation of the PI3K/AKT/mTOR Pathway in Cajal–Retzius Cells Leads to Their Survival and Increases Susceptibility to Kainate-Induced Seizures
Source: MDPI journal article supplement (doi:10.3390/ijms24065376), 2023-03-11
Supplement: s1 [file s1]

### A- Open field

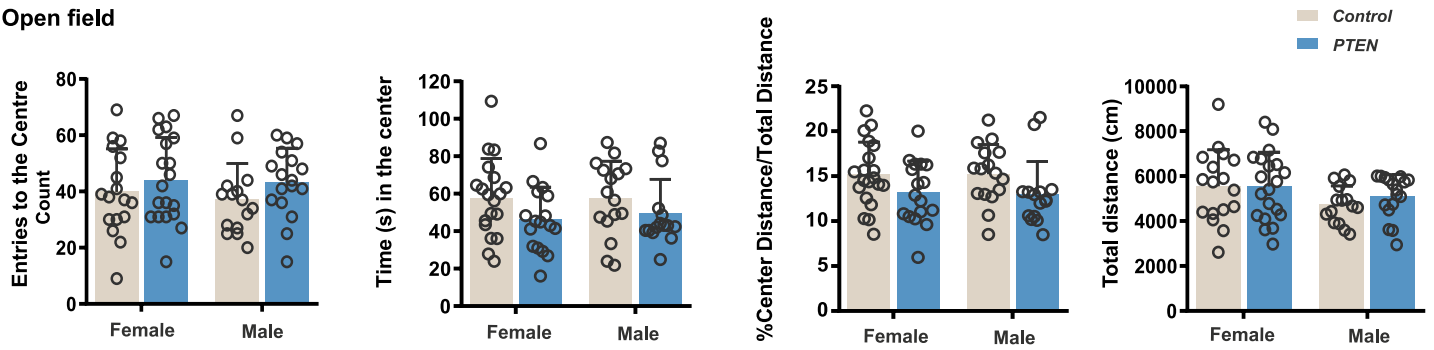

### B-Vertical activity

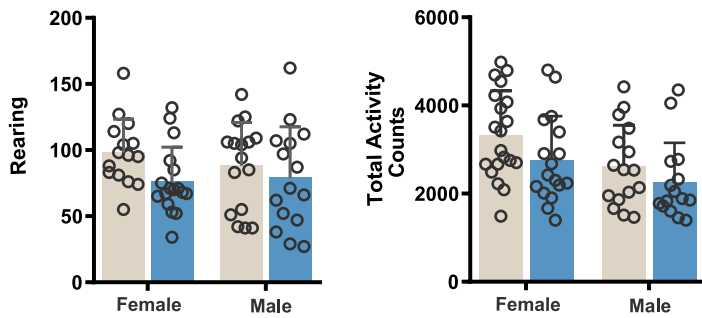

### C-Y Maze

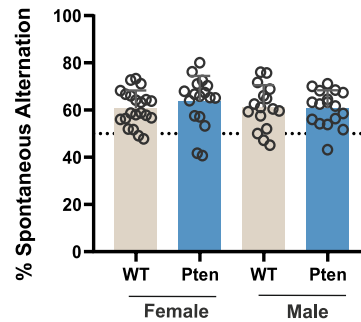

### D-Kainate injection

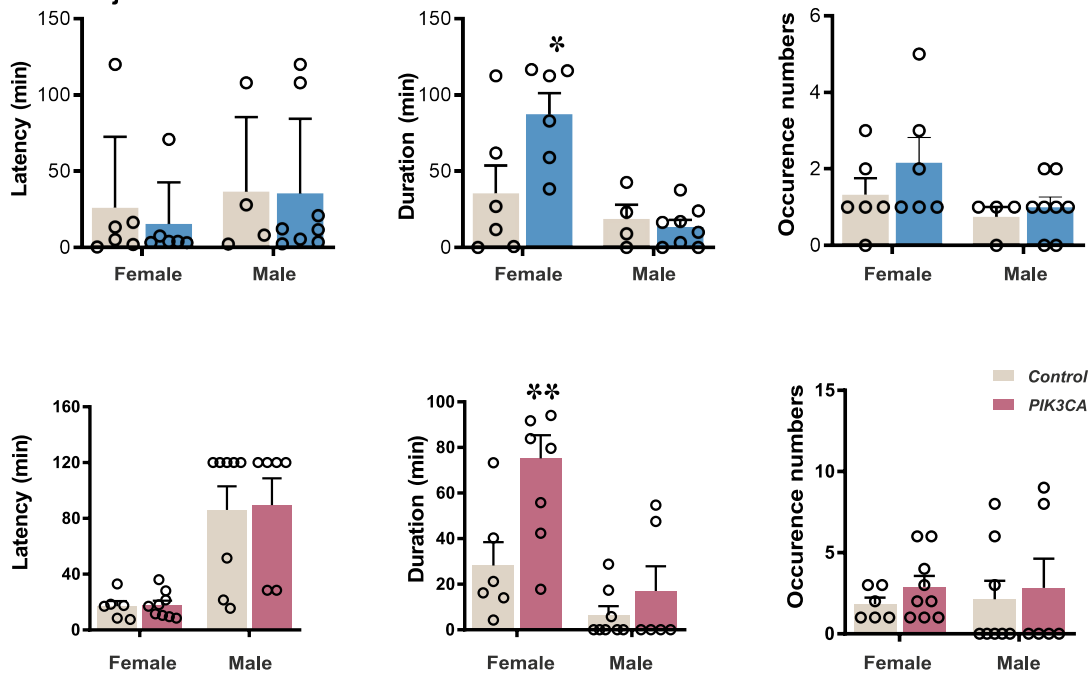

**Figure S4\_ Inactivation of PTEN in  $\Delta$ NP73 derived CRs does not alter general animal behavior but increase the sensitivity of mutant females to kainate-induced seizures.**
